1 **A Positive Regulatory Feedback Loop Between EKLF/ KLF1 and TAL1/SCL**  
2 **Sustaining the Erythropoiesis**

3

4

5 Chun-Hao Hung<sup>a,b,\*</sup>, Yu-Szu Huang<sup>a,c,\*</sup>, Tung-Liang Lee<sup>a,\*</sup>, Kang-Chung Yang<sup>d,e,\*</sup>,  
6 Yu-Chiau Shyu<sup>a,†</sup>, Shau-Ching Wen<sup>a</sup>, Mu-Jie Lu<sup>a,b</sup>, Shinsheng Yuan<sup>e,#</sup>, Che-Kun James  
7 Shen<sup>a,c,f#</sup>

8

9

10 Institute of Molecular Biology, Academia Sinica, Taipei, Taiwan<sup>a</sup>; Department of Life  
11 Science and Institute of Genomic Research, National Yang-Ming University, Taipei,  
12 Taiwan<sup>b</sup>, Institute of Molecular Medicine, College of Medicine, National Taiwan  
13 University, Taipei, Taiwan<sup>c</sup>; Genome and Systems Biology Degree Program, College of  
14 Life Science, National Taiwan University, Taipei, Taiwan<sup>d</sup>; Institute of Statistical Science,  
15 Academia Sinica, Taipei, Taiwan<sup>e</sup>; The PhD Program for Neural Regenerative Medicine,  
16 Taipei Medical University, Taiwan<sup>f</sup>

17

18 Running Head: Activation of *Tal1* gene by EKLF

19

20 # Corresponding Authors- Che-Kun James Shen <[ckshen@imb.sinica.edu.tw](mailto:ckshen@imb.sinica.edu.tw)>

21

Shinsheng Yuan <[syuan@stat.sinica.edu.tw](mailto:syuan@stat.sinica.edu.tw)>

22

23 † Present address- Community Medicine Research Center, Chang Gung Memorial  
24 Hospital, Keelung branch, Keelung 204, Taiwan, ROC.

25

26 \*These authors contributed equally to this work

27

28 Key words: Erythroid differentiation; EKLF/ KLF1; Gene Knockout; TAL1/ SCL;  
29 Global Gene expression profiling; Direct target genes; Genomic footprinting  
30 of *Tal1* Promoter; Transcriptional regulation

31

32 **Abstract**

33 The erythroid Krüppel-like factor EKLF/KLF1 is a hematopoietic transcription factor  
34 binding to CACCC DNA motif and participating in the regulation of erythroid  
35 differentiation. With combined use of microarray-based gene expression profiling and  
36 promoter-based CHIP-chip assay of E14.5 fetal liver cells from wild type (WT) and  
37 EKLF-knockout (*Eklf*<sup>-/-</sup>) mouse embryos, we have identified the pathways and direct  
38 target genes activated or repressed by EKLF. This genome-wide study together with  
39 molecular/ cellular analysis of mouse erythroleukemic cells (MEL) indicate that among  
40 the downstream direct target genes of EKLF is *Tal1/Scl*. *Tal1/Scl* encodes another  
41 DNA-binding hematopoietic transcription factor TAL1/SCL known to be an *Eklf* activator  
42 and essential for definitive erythroid differentiation. Further identification of the authentic  
43 *Tall* gene promoter in combination with *in vivo* genomic footprinting approach and DNA  
44 reporter assay demonstrate that EKLF activates *Tall* gene through binding to a specific  
45 CACCC motif located in its promoter. These data establish the existence of a previously  
46 unknown positive regulatory feedback loop between two DNA-binding hematopoietic  
47 transcription factors that sustains the mammalian erythropoiesis.

48

## 49 INTRODUCTION

50 Erythropoiesis is a dynamic process sustained throughout whole lifetime of  
51 vertebrates for the generation of red blood cells from pluripotent hematopoietic stem cell  
52 (HSC). In the ontogeny of mouse erythropoiesis, the major locations of HSC change  
53 orderly for several times, convert from embryonic yolk sac to fetal liver and then to the  
54 spleen and bone marrow in adult mice (1). At each of these tissues, the multistep  
55 differentiation process of erythropoiesis begins at the level of pluripotent hematopoietic  
56 stem cells (HSCs) and terminates with the production of erythrocytes (RBCs) and it is  
57 accompanied with a series of lineage-specific activation and restriction of gene  
58 expression. This stage-specific gene regulation cascade is mediated by several  
59 erythroid-specific/ erythroid-enriched transcription factors, including GATA1, TAL1/SCL,  
60 NF-E2, and EKLF (2-5).

61 Among the factors regulating erythropoiesis lies the Erythroid Krüppel-like factor  
62 (EKLF/KLF1). EKLF is a pivotal regulator that functions both in erythroid differentiation  
63 and in controlling the lineage fate decision by the bipotential megakaryocyte-erythroid  
64 progenitors (MEPs) (6-10). *Eklf* is the first identified member of the KLF family of genes  
65 expressed in the erythroid cells, mast cells and their precursors (11, 12) as well as some  
66 of the other types of the hematopoietic cells but at low levels (6,13; Bio GPS). The  
67 critical function of *Eklf* in erythropoiesis has been demonstrated initially by gene  
68 abolition studies, with the *Eklf*-knockout mice (*Eklf*<sup>-/-</sup>) displaying severe anemia and died  
69 in utero at around embryonic (E) day 14.5 (E14.5) (14, 15). In addition to the dramatic  
70 decrease of the adult  $\beta$  globin gene expression, the molecular and cellular basis of  
71 lethality of *Eklf*<sup>-/-</sup> mice is far more complex (8, 16). In particular, the impairment of the  
72 definitive erythropoietic differentiation is a major cause of embryonic lethality in *Eklf*<sup>-/-</sup>  
73 mice in addition to  $\beta$ -thalassemia (17, 18). Significant reduction of the number of  
74 macrophages and abnormal macrophage morphology have also been observed in the  
75 E14.5 fetal liver of *Eklf*<sup>-/-</sup> mice (13).

76 EKLF regulates its downstream genes, including the adult  $\beta$  globin genes,

77 through binding of its C-terminal C<sub>2</sub>H<sub>2</sub> zinc finger domain to the canonical binding  
78 sequence CCNCNCCC located in the promoters or enhancers (18-20) and the recruitment  
79 of co-activators, eg. CBP/p300 (21) and SWI/SNF-related chromatin remodeling complex  
80 (22, 23), or co-repressors, eg. mSin3A/HDAC1 (18) and Mi-2 $\beta$ /NuRD (7) complexes.  
81 Moreover, clinical associations exist between *Eklf* gene and different human  
82 hematopoietic phenotypes or diseases including  $\beta$ -thalassemia, the congenital  
83 dyserythropoietic anemia 4 (CDA4), neonatal anemia, the increased red blood cell  
84 protoporphyrin, hereditary persistence of fetal hemoglobin (HPFH), borderline HbA<sub>2</sub>, and  
85 inhibitor of Lutheran [In(Lu)] blood type (10, 24, 25). In erythroid progenitors, eg. CFU-E  
86 and Pro-E, EKLF is mainly located in the cytoplasm. Upon differentiation of Pro-E to  
87 Baso-E, EKLF is imported into the nucleus (20, 26) and form distinct nuclear bodies  
88 colocalized the  $\beta$ -globin locus, RNA polymerase II, SC35, and PML in discrete nuclear  
89 bodies (20, 27). In this way, EKLF participates in the spatial organization of chromatin  
90 configuration for efficient and coordinated transcription of genes including the  $\beta$ -globin  
91 locus in erythroid cells. More recently, genome-wide analysis of the global functions of  
92 mouse EKLF through identification of the direct transcription target genes has been  
93 conducted by using ChIP-Seq in combination with gene expression profiling (28, 29). The  
94 results from these studies suggest that EKLF functions mainly as a transcription activator  
95 in cooperation with TAL1/SCL and/or GATA1 to target genes including those required for  
96 terminal erythroid differentiation (28-30). However, much remains to be reconciled  
97 between the two studies with respect to the diversity of the genomic EKLF-binding  
98 locations and the deduced EKLF regulatory networks.

99 Besides EKLF, there are several other factors that have been shown to regulate  
100 erythropoiesis (2, 5). In particular, the T-cell Acute Lymphocytic Leukemia 1 (TAL1), also  
101 known as the Stem Cell Leukemia (SCL) protein, plays a central role in erythroid  
102 differentiation as well. The role of *Tall/Scl* in primitive erythropoiesis has been  
103 demonstrated by the lethality of *Tall*<sup>-/-</sup> mice at E9.5 because of a complete absence of  
104 primitive erythrocyte in yolk sac (31, 32). Studies using erythroid cell lines (33) or  
105 adult-stage conditional *Tall* gene knockout mice (34, 35) have shown the requirement of  
106 *Tall* in definitive erythropoiesis. Another transcription factor known to play important

107 roles in erythropoiesis is the zinc-finger DNA-binding protein GATA1, the consensus  
108 binding box ((T/A)GATA(A/G)) of which is present in the promoters and enhancer of  
109 most erythroid-specific genes (36-38). The cooperative functioning of TAL1 and GATA-1  
110 in the regulation of erythropoiesis is closely associated with their physical associations  
111 at thousands of genomic loci (39).

112 Interestingly, *Eklf* appears to be a downstream target gene of the TAL1 factor.  
113 Whole-genome ChIP-seq analysis has identified the binding of TAL1 protein on the *Eklf*  
114 promoter in the primary fetal liver erythroid cells (40). Furthermore, there exists in the  
115 *Eklf* gene promoter the composite sequence of GATA-E box-GATA, which is a potential  
116 binding site of the GATA1-TAL1 protein complex required for the expression of *Eklf* gene  
117 in a transgenic mouse system (41). In the study reported below, we have combined  
118 promoter-based ChIP-chip technique using a high-specificity anti-EKLF antibody and  
119 microarray-based gene expression profiling to provide a genome-wide overview of the  
120 genes targeted by EKLF in the E14.5 mouse fetal liver cells. Remarkably, *Tall* has turned  
121 out to be a direct target gene of EKLF, indicating the existence of a positive feedback loop  
122 between *Eklf* and *Tall* for the regulation of erythropoiesis in mammals.

123

## 124 MATERIALS AND METHODS

### 125 Generation of *Eklf*<sup>-/-</sup> mice

126 As described elsewhere (Hung et al., unpublished), the generation of B6 mouse lines  
127 with homozygous knockout of *Eklf* gene, *Eklf*<sup>-/-</sup>, was carried out in the Transgenic Core  
128 Facility (TCF) of IMB, Academia Sinica, following the standard protocols with use of  
129 BAC construct containing genetically engineered *Eklf* locus and E2A-Cre mice.

### 130 Gene expression profiling by Affymetrix array hybridization

131 E14.5 mouse fetal livers from WT and *Eklf*<sup>-/-</sup> mouse fetuses were homogenized by  
132 repeated pipetting in phosphate-buffered saline (PBS) (10 mM phosphate, 0.15 M NaCl  
133 [pH 7.4]). Total RNAs were then isolated with Trizol reagent (Invitrogen) and subjected to  
134 genome-scale gene expression profiling using the Mouse Genome Array 430A 2.0  
135 (Affymetrix, Inc.). Standard MAS5.0 method was applied to normalize the gene  
136 expression data. Gene expression values were log-transformed for later comparative  
137 analysis. Statistical analysis was carried out using R 3.0.2 language (R Development Core  
138 Team, 2013, <http://www.R-project.org>)

### 139 Identification of differentially expressed genes

140 Genes with differential expression patterns between the WT and *Eklf*<sup>-/-</sup> mice E14.5  
141 fetal liver were first identified using two-sided two sample t-test with the significance  
142 level at 0.05. Since the set of probes for each annotated gene should all exhibit the same  
143 direction or sign when comparing the WT and *Eklf*<sup>-/-</sup> samples, this consistency check was  
144 used to remove 257 ambiguous genes from the gene list. After filtering by the *p*-value  
145 threshold, a subset containing 12,277 statistically significant probe sets was obtained.

146

### 147 Identification of EKLF-bound targets by using NimbleGen ChIP-chip array 148 hybridization

149           The E14.5 mouse fetal liver cells were cross-linked, sheared, and the EKLF  
150 bound-chromatin complexes were immuno-precipitated (ChIP) with the AEK antibody  
151 (20) and rabbit IgG, respectively. DNAs were then purified from the immunoprecipitated  
152 chromatin samples by QIAquick PCR purification kit (Qiagen) and amplified by the  
153 Sigma GenomePlex WGA kit for hybridization with the Roche NimbleGen Mouse  
154 ChIP-chip 385K RefSeq promoter arrays.

155           There were 768,217 probes on the NimbleGen 385K ChIP-chip array. These probes  
156 were grouped into 21,536 sequence ids each of which contained 5 to 320 probes that  
157 ranged from 49 bp to 74 bp in length. The distances between the probes in the same  
158 sequence id ranged from 100 bp to 3,700 bp. In general, these sequence ids are located in  
159 the promoter regions of genes, roughly from -3.75kb to +0.75 kb relative to the  
160 transcription start site (TSS). The sequence id would be assigned a gene name when the  
161 gene's coding sequence overlapped with the region from 10 kb upstream to 10 kb  
162 downstream of the sequence id. In this way, 652 sequence ids were found to be located in  
163 the intergenic regions and 20,884 sequence ids were near the coding regions of genes.

164           To identify the binding targets of EKLF, the moving window with size equal to 5 was  
165 adopted to test the hypothesis on positive mean value using one-sided t-test with the  
166 significant level at 0.0017. This smaller cut-off value was chosen to account for the  
167 multiple comparison. Specifically, there were 35 probes in each sequence id, and the  
168 adjusted *p*-value was derived by  $(1-(1-0.0017)^{30}) \sim 0.05$ . The moving window was applied  
169 to each sequence id separately. Finally, the results were summarized at the sequence id  
170 level, and a sequence id would be defined as a target site of EKLF if there was a  
171 significant peak in the sequence id.

172

### 173 **Matching between Affymetrix probes and NimbleGen ChIP-chip probes**

174           The E14.5 fetal livers gene expression data obtained from Affymetrix array  
175 hybridization analysis allowed us to further reduce the false positives from the ChIP-chip



176 dataset. To do this, the annotation strategy used in annotating the sequence ids in  
177 ChIP-chip array was adopted to match the probes from these two platforms by gene  
178 symbols. After this procedure, there were a total of 78,634 matched pairs between the  
179 ChIP-chip sequence ids and Affymetrix probes.

180

### 181 **Co-occurrence of Binding Motifs and Relative Distance Distribution**

182 226 known transcription factor-binding motifs were extracted from the previous  
183 report (28). For each of these binding motifs, the number of sequences in the mouse  
184 genome bearing the motif was sorted. The top co-existing binding motifs with EKLf were  
185 then further investigated. The relative distance between a co-existing motif and the  
186 EKLf-binding motif was calculated for each sequence id. However, when there existed  
187 multiple binding motifs in the same sequence id, multiple distances would be generated.  
188 In that case, the shortest distance was selected as the representative distance in that  
189 sequence id. The relative distance distribution was then plotted to inspect the potential  
190 localization biases. The existence of a localization bias provided further indication that  
191 two transcription factors might interact in certain way to regulate the particular target  
192 gene(s).

193

### 194 **Functional enrichment analysis**

195 The analysis was carried out with use of IPA (Ingenuity<sup>®</sup> Systems,  
196 [www.ingenuity.com](http://www.ingenuity.com)) to identify genes significantly associated with specific biological  
197 functions and/or diseases in the Ingenuity Knowledge Base. Right-tailed Fisher's exact  
198 test was used to calculate the p-value determining the probability that each biological  
199 function and/or disease assigned to that data set was due to chance alone. The list of genes  
200 with significant EKLf-binding enrichment and deemed to be expressed differentially in  
201 WT and KO mice fetal livers was imported into IPA. The up-regulated and

202 down-regulated EKLF targets were first mapped to the functional networks available in  
203 the IPA database, and then ranked by scores computed with the right-tailed Fisher's exact  
204 test mentioned above. As listed in Supplemental Tables S3A and S3B, this analysis  
205 identified significant over-represented molecular and cellular functions ( $p$  value < 0.05)  
206 associated with the imported up-regulated and down-regulated EKLF targets that were  
207 eligible (score > 25) with the significance scores 26 and 34, respectively (Fig. S1 and S2).

208

## 209 **ChIP-qPCR**

210 The ChIP-PCR analysis followed the procedures by Daftari *et al.* (42). The  
211 sonicated cell extracts from formaldehyde cross-linked E14.5 day mouse fetal liver cells  
212 were immuno-precipitated with anti-EKLF and purified rabbit IgG, respectively. The  
213 precipitated chromatin DNAs were purified and analyzed by quantitative PCR (qPCR) in  
214 the Roche LightCycle Nano real-time system. Sequences of the primers used for q-PCR  
215 designed by our lab are list in Supplementary Table 7. Each target gene was amplified  
216 with one set of primers flanking the putative EKLF-binding CACCC motif(s) and two  
217 sets of non-specific primers bracketing regions located at upstream and downstream of  
218 the CACCC motif(s), respectively.

219

## 220 **Plasmid construction**

221 Mouse *Eklf* cDNA was derived by RT-PCR of RNA from DMSO-induced MEL cells  
222 and cloned into the vector pCMV-Flag (Invitrogen), resulting in pFlag-EKLF. Plasmids  
223 for luciferase reporter assay were constructed in the following way: *Tall* promoter region  
224 from -1 to -900 relative to transcription start site of the newly identified *Tall* exon 1 was  
225 amplified by PCR of mouse genomic DNA, with the addition of a XhoI cutting site at 5'  
226 end and a HindIII site at 3' end, and cloned into the XhoI and HindIII sites in the  
227 psiCHECK™-2 Vector (Promega) resulting in the plasmid p*Tall*-Luc. *Tall* promoter  
228 DNA fragments with the putative EKLF-binding CACCC box(es) mutated were generated  
229 by fusion PCR using the endogenous *Tall* promoter as the template. Sequences of the

230 three mutated CACCC boxes and their flanking regions in these fragments are: E1 box,  
231 5'-CAGGCAAAACCAGGGACCAcatatTTAAAAATGATTCCCCTTCTCAAG-3'; E2  
232 box, 5'-CAATAGCTCTTCAGTTAGCGGTGAAGGCTCATGAAcatatCCAC-3'; E3  
233 boxes, 5'-GAGTTATTGACACAGCCCTGTcatatCCTCCCCCCTG-3'. The inserts of  
234 all the plasmids were verified by DNA sequencing before use.  
235

### 236 **Cell culture, differentiation, DNA transfection and knockdown of gene expression**

237 Murine erythroleukemia cell line (MEL) was cultured in Dulbecco's modified Eagle  
238 medium containing 20% fetal bovine serum (Gibco), 50 units/ml of penicillin, and 50  
239 µg/ml of streptomycin (Invitrogen). For induction of differentiation, the cells at a density  
240 of  $5 \times 10^5$  /ml were supplemented with 2% dimethyl sulfoxide (DMSO; Merck) and the  
241 culturing was continued for another 24 to 72 hr. DNA transfection of the MEL cells and  
242 K562 cells was carried out using the TurboFect transfection reagent (Thermo Scientific)  
243 and Lipofectamine® 2000 transfection reagent (Life Technologies), respectively.

244 For knockdown of *Eklf* gene expression, MEL cell line-derived clones 4D7 and  
245 2M12 (7) were maintained in 20 µg/mL of blasticidin (Invitrogen) and 1 mg/mL of G418  
246 (Gibco). Differentiation of 4D7 and 2M12 cells was induced by 2% dimethyl sulfoxide  
247 (DMSO; Merck) for 48 hr. Expression of shRNA targeting and knocking-down *Eklf* was  
248 induced by the addition of 2 µg/ml of doxycycline (Clontech) for 96 hr, as described in  
249 Bouilloux et al. (7).

250

### 251 **RNA analysis**

252 Total RNA from MEL cells and fetal liver suspension cells were extracted with  
253 TRIzol reagent (Invitrogen). cDNAs were synthesized using SuperScript II Reverse  
254 Transcriptase (RT) (Invitrogen) and oligo-dT primer (Invitrogen). Taq DNA polymerase  
255 was used for semi-quantitative RT-PCR analysis of the cDNAs. Quantitative real-time  
256 PCR (qPCR) analysis of the cDNAs was carried out using the LightCycler® 480 SYBR

257 Green I Master (Roche Life Science) and the products were detected by Roche  
258 LightCycler LC480 Real-Time PCR instrument. Primers used for qPCR analysis were  
259 designed following previous reports or from the online database PrimerBank:  
260 <http://pga.mgh.harvard.edu/primerbank>. Primers used for validating the microarray data  
261 and for *Tall* exon 1 identification by RT-PCR were designed by our lab. The sequences of  
262 the DNA primers used in semi-quantitative RT-PCR and real-time RT-qPCR are available  
263 upon request.

264

### 265 **Western blotting analysis and antibodies**

266 Whole-cell extract of MEL or mouse fetal liver cells were analyzed by  
267 polyacrylamide gel electrophoresis (PAGE) and Western blotting following the standard  
268 protocols. Enhanced chemiluminescence (ECL) detection system (Omics Biotechnology  
269 Co.) was used to visualize the hybridizing bands on blots. Goat anti-TAL1 antibodies,  
270 sc-12982 and sc-12984, were purchased from Santa Cruz, Inc. Anti-Flag (M2),  
271 anti-Tubulin(B-5-1-2), and anti- $\beta$ -Actin (AC-15) mouse antibodies were purchased from  
272 Sigma-Aldrich. The anti-EKLF antibody (anti-AEK) was homemade (19).

273

### 274 **Reporter assay**

275 For luciferase reporter assay in 293T cells, 1  $\mu$ g of each of the wild-type p*Tall*-Luc  
276 plasmid or its mutant forms were transfected into  $4 \times 10^5$  /ml of cells. The total amount of  
277 transfected DNA was kept at 0~3  $\mu$ g with addition of 0~3  $\mu$ g of empty vector pCMV-Flag.  
278 After 24 hr, the luciferase activities were measured using the Dual-Luciferase® Reporter  
279 Assay System (Promega). Firefly luciferase activity was used as an internal control and  
280 Renilla activity was used to monitor the transactivity of the *Tall* promoter or its mutant  
281 forms.

282

### 283 ***In vivo* genomic footprinting**

284 The status of nuclear factor-binding in the living MEL cells was investigated by

285 dimethyl sulfate (DMS) cleavage *in vivo* and ligation-mediated PCR (LMPCR) as  
286 described previously (43,44) with some modification. The distal promoter region was  
287 analyzed with primer set D (P1[5'-885 GCTCACAAA CT CCT GTTTCAGAGGAG-860  
288 3'], P2 [5'-867CAGAGGAGCTAATGTT CTGCCTTCTTC-840 3'], and P3 [5'-867  
289 CAGAGGAGCTAATGTGTCTGCCTTCTTCTAG-837 3']); the central promoter region  
290 was analyzed with primer set C (P1[5'-817GACATTAATACAGGCAAACCAGG  
291 GACC-790 3'], P2[5'-798CCAGGGACCAC ACCCTTAAAAATGATTCC-770 3'], and  
292 P3[5'-798CCAGGGACCAC ACC CTTAAAAATGATTCCCC-768 3']); the proximal  
293 promoter region was analyzed with the primer set P(P1[5' 320GAAAGAAAAACCCAG  
294 A TACTCCTCAGC-294 3'], P2 [5'-287GGTTCCTACAATGTACCTATGG GCTTC-261  
295 3'], and P3[5'-287GG TTCCTACAATGTACCTATGGGCTTCAATG-257 3']). Different  
296 batches of DMS-treated cells were analyzed several times to check for consistency of the  
297 protection patterns. The relative intensities of the bands on the autoradiographs were  
298 estimated in a AlphaImager 2200 (Clontech).

299

## 300 RESULTS

### 301 Genome-wide identification of EKLF target genes by microarray hybridization and 302 promoter-based ChIP-chip analyses

303 We first carried out gene profiling analysis to identify genes regulated by EKLF. The  
304 microarrays were hybridized with cDNAs derived from E14.5 fetal liver RNAs of four  
305 wild-type (WT) and four *Eklf* knockout (KO or *Eklf*<sup>-/-</sup>) embryos, respectively (Fig. 1A).  
306 Overall, there were 6,975 genes with differential expressions levels between the WT and  
307 KO mice (Fig. 1B, 1C, and 1D). Notably, the confidence index of the microarray  
308 hybridization analysis was approximately 70%, as the upregulation/ downregulation of 8  
309 out of 12 genes could be validated by semi-quantitation RT-PCR analysis (Fig. S3).

310 We then performed ChIP-chip analysis (Fig. 1C) using a promoter-based microarray  
311 and the high-specificity polyclonal anti-mouse EKLF antibody (anti-AEK) (19, 26); (Fig.  
312 1). The probes on the ChIP-chip array were grouped into 21,536 sequence ids (SEQ\_ID).

313 The promoter of each annotated gene was defined as the region from -3.75kb upstream to  
314 0.75 kb downstream of the transcription start site (TSS). The SEQ\_IDs with at least one  
315 significant peak were defined as the potential target binding sites of EKLF. Overall,  
316 enriched EKLF-binding was present in 5,323 SEQ\_IDs corresponding to 4,578 promoters  
317 (Fig. 1C and Fig. 1D). We also validated the ChIP-chip data by ChIP-qPCR. 9 of 13  
318 promoters on the ChIP-chip list indeed were bound with EKLF as shown by this assay  
319 (Fig. S4).

320 The data from the ChIP-chip and the microarray gene profiling experiments were  
321 then combined to identify the putative EKLF target genes. After matching between the  
322 11,549 differentially expressed probe sets from the microarray data and the 5,323  
323 significant SEQ\_IDs from the ChIP-chip array data, 2,391 SEQ\_IDs (11.1%) from the  
324 ChIP-chip data and 3,467 probe sets (7.7%) from the microarray hybridization data  
325 remained. In the end, combination of the two data sets resulted in 2,644 distinct genes  
326 (Fig. 1C and Table S2A). This gene list included only genes with altered expression level  
327 in the *Eklf*<sup>-/-</sup> fetal liver at the  $p < 0.05$  level and with at least one statistically significant  
328 EKLF-binding site ( $p < 0.0017$ ) in the promoter region without considering the fold  
329 change of expression and enrichment of binding.

330 Upon filtering with the effect sizes of the ChIP-chip data ( $>0.25$ ) and microarray  
331 profiling data ( $> 0.5$ ), the number of EKLF-bound and regulated targets was reduced from  
332 2,644 to 1,866, among which 1,156 were down-regulated and 710 were up-regulated in  
333 E14.5 WT fetal liver (Fig. 1C , Fig. 1D, Table S2B and Table S2C). The above data  
334 supported the scenario that the promoter-bound EKLF could function as either repressors  
335 or activators *in vivo*. Notably, the promoters bound with and regulated by EKLF were  
336 distributed throughout the mouse genome with no obvious preference for any  
337 chromosome (Fig. 2A and 2B).

338

339 **Functional and pathway analysis of EKLF target genes**

340 Previously reports by others using the Ingenuity Pathway analysis (IPA) and GeneGo  
341 MetaCore analysis platform showed that EKLF target genes were associated with a  
342 variety of cellular activities or pathways including general cellular metabolism, cell  
343 maintenance, cell cycle control, DNA replication, general cell development and  
344 development of hematologic system (29, 47). To gain further insight into the potential  
345 biological roles and functions of EKLF, we applied the IPA software for analysis of the  
346 putative 1,866 direct target genes of EKLF. The analysis identified the top five  
347 over-represented networks of the down-regulated EKLF targets and up-regulated EKLF  
348 targets, respectively (Table 1). The significance of the relevant networks were  
349 strengthened with use of the higher cut-off score of 25 to ensure that reliable functional  
350 networks built by IPA were eligible (Table 1, Supplementary Table S3A and S3B). This  
351 network analysis by us confirmed the previously established association of the  
352 hematological system development/ function with the up-regulated EKLF targets (29).  
353 Notably, the top network associated with either the down-regulated EKLF targets or  
354 up-regulated EKLF targets was related to metabolism and small molecule biochemistry  
355 (Table 1). Additionally, the significant networks/functions associated with the  
356 down-regulated EKLF targets were more broad than those with the up-regulated EKLF  
357 targets (Table 1). Overall, our analysis was consistent with the previous studies (28, 29) in  
358 that the promoter occupancy by EKLF also played important roles in developmental  
359 processes, other than erythropoiesis and hematological development.

360 We also used IPA software to group the number of EKLF targets according to their  
361 respective biological functions, regulatory pathways and physiological functions (Tables 2,  
362 S4A and S4B). Of the top five molecular and cellular functions, the cell death/ survival,  
363 cellular assembly/ organization, and cellular function/ maintenance were overrepresented  
364 in both the up-regulated as well as down-regulated EKLF targets. Further enrichment  
365 analysis of the canonical pathways using the IPA software revealed significant  
366 overrepresented pathways across the same two genes lists (Tables 3, S5A and S5B). The  
367 prominent enrichment of the up-regulated EKLF targets were related to cell cycle control  
368 of chromosomal replication, EIF2 signaling, mitochondrial dysfunction, hypusine  
369 biosynthesis, and tryptophan degradation III (Eukaryotic) (Supplementary Fig. S5). The

370 enrichment of the down-regulated EKLf targets was related to insulin receptor signaling,  
371 chondroitin sulfate degradation (Metazoa), gap junction signaling, nitric oxide signaling  
372 in the cardiovascular system, and PDGF signaling (Supplementary Fig. S6). The above  
373 together further established the specific functions and associated biological pathways  
374 associated with the EKLf target genes.

375

### 376 **Identification of potential transcription factors co-regulating the EKLf targets**

377 Since co-occurrences of specific transcription factor-binding motifs in the promoters  
378 would suggest the cooperation of these factors in transcriptional regulation (48, 49), we  
379 searched factor-binding motifs across the EKLf-bound promoters as described in Material  
380 and Methods. Specifically, the consensus transcription factor-binding motifs were ranked  
381 based on how often a particular motif occurred within the sequence id. This observed  
382 frequency was applied to all the consensus transcription factor-binding motifs identified  
383 within the EKLf-bound regions on each sequence id (Table 4 and Supplementary Table  
384 S6). As expected, the most abundant transcription factor-binding motif in the  
385 EKLf-bound and regulated promoters was the consensus EKLf-binding sequence  
386 CACCC, which was present a total of 2,390 times in 2,391 of EKLf target sequence ids  
387 corresponding to 2,143 times in 2,644 distinct gene promoters. Consistent with Tallack et  
388 al. (28), the binding motifs of known transcription factors functionally interacting with  
389 EKLf, such as TAL1 and GATA1 (28), were also identified, which were present at least  
390 once in 2,390 (2,143 distinct gene promoters) and 2,384 (2,139 distinct gene promoters)  
391 of the EKLf target sequence ids, respectively. In addition, the binding motifs of a number  
392 of other transcription factors possibly interacting with EKLf functionally, such as PEA3,  
393 LVA, H4TF-1 and XREbf, etc., were also identified in this way (Tables 4 and S6).

394 To investigate the functional cooperation between TAL1 and EKLf or between  
395 GATA1 and EKLf, we further analyzed the distance between the binding motifs of  
396 GATA1 or TAL1 and that of EKLf. Indeed, the distribution of TAL1 binding motifs has  
397 the highest frequencies between +100 bp and -100 bp from EKLf binding motifs,



398 indicating a functional cooperation between TAL1 (or possibly Ldb1 complex) and EKLF.  
399 Moreover, this cooperation likely acts through the binding of TAL1 at upstream of EKLF  
400 protein (Fig. 2C). The distribution pattern of GATA1 binding motifs also supported the  
401 cooperation between this factor and EKLF (Fig. 2D), although there is no obvious  
402 upstream/downstream preference between these two factors.

### 403 **Likelihood of *Tal1* gene as a regulatory target of EKLF in E14.5 fetal liver cells**

404 Our motif analysis across the EKLF-bound promoters revealed that the binding  
405 motifs of the transcriptional factor TAL1 had the highest frequency of co-occupancy with  
406 the binding motifs of EKLF (Table 4), suggesting a functional cooperation between these  
407 two factors in transcriptional regulation. Interestingly, such cooperation in the  
408 hematopoietic system were often associated with the transcriptional activation of one  
409 partner by another partner (29, 30). For instance, either the EKLF-GATA1 or  
410 TAL1-GATA1 duet served as part of specific activation complex(es) in the erythroid cells  
411 (49-51), and both the *Eklf* gene (52, 53) and the *Tal1* gene (54) were activated by the  
412 GATA1 factor. We thus further investigated whether there was also an epistatic  
413 relationship between *Eklf* and *Tal1*.

414 Gene expression profiling by microarray hybridization revealed a 2.5-fold (effect  
415 size=1.3139) down-regulation of the *Tal1* transcript in E14.5 *Eklf*<sup>-/-</sup> fetal liver in  
416 comparison to the wild-type E14.5 fetal liver (Supplementary Table S2A). This  
417 microarray data was validated by RT-qPCR. As shown, the level of *Tal1* mRNA in the  
418 *Eklf*<sup>-/-</sup> fetal livers was decreased significantly, down to 47% of the level detected in  
419 wild-type fetal liver (left histogram, Fig. 3A). In parallel, the TAL1 protein level in the  
420 *Eklf*<sup>-/-</sup> fetal livers cells was also down-regulated, by 70%, when compared to the wild type  
421 (right panels and histogram, Fig. 3A). Thus, not only TAL1 factor could activate the *Eklf*  
422 gene transcription (40-41), but the *Tal1* gene might also be a regulatory target of EKLF.  
423 Since *Eklf*<sup>-/-</sup> mice and *Tal1*<sup>-/-</sup> mice both exhibited a deficit of erythroid-lineage cells after  
424 the stage of basophilic erythroblasts (34, 47), we suspected that the promotion of erythroid  
425 terminal differentiation from pro-erythroblasts to basophilic erythroblasts very likely

426 required EKLFF-dependent activation of the *Tall* gene transcription.

#### 427 **EKLFF as an activator of *Tall* gene expression during erythroid differentiation**

428 To further examine whether EKLFF was an activator of *Tall* gene transcription in  
429 erythroid cells, we first analyzed the expression level of *Tall* mRNA in cultured mouse  
430 erythroid leukemic (MEL) cells during DMSO induced erythroid differentiation. Similar  
431 to  $\beta$ maj mRNA, the *Tall* mRNA was expressed in un-induced MEL at a basal level, which  
432 was increased by 2-3 folds upon DMSO differentiation (top, Fig. 3B). In consistency, the  
433 protein level of TAL1 was also up-regulated during an 48 hr period of DMSO-induced  
434 differentiation, but down-regulated subsequently (bottom, Fig. 3B). The up-regulation of  
435 the *Tall* gene supported the scenario that sustained higher expression of the *Tall* gene was  
436 required for erythroid differentiation. The biphasic expression profile of the TAL1 protein  
437 further suggested that the requirement of TAL1 for MEL cell differentiation was up to 48  
438 hr after DMSO-induction, which corresponded to the basophilic / polychromatic stages of  
439 erythroid differentiation.

440

441 We then analyzed *Tall* mRNA levels in two independent MEL cell-derived stable  
442 clones, 4D7 and 2M12. As shown in Fig. 3C, knock-down of *Eklf* mRNA by the  
443 doxycycline-induced shRNAs led to a significant reduction of the *Tall* mRNA under the  
444 condition of DMSO-induced erythroid differentiation, but not in un-induced MEL cells.  
445 The latter result further supported that EKLFF was not part of the regulatory program of  
446 *Tall* gene transcription in MEL cells prior to their differentiation. The data of Fig. 3C  
447 indicated that EKLFF was required for the activation of *Tall* gene transcription during  
448 DMSO-induced erythroid differentiation of MEL cells. Together with the loss-of-function  
449 of *Eklf* study in mouse fetal liver (Fig. 3A), we conclude that while TAL1 is a known  
450 activator of *Eklf* gene transcription, EKLFF also positively regulates *Tall* gene transcription  
451 during erythroid differentiation from CFU-E/ pro-erythroblasts to the basophilic /  
452 polychromatic erythroid cells.

453

#### 454 **Binding *in vivo* of EKLF to the upstream promoter of *Tall* Gene**

455 How would EKLF activate the *Tall* gene transcription during erythroid  
456 differentiation ? It could either directly activate the *Tall* gene through DNA-binding in  
457 the regulatory regions of the gene, eg. its promoter or enhancer, or indirectly through  
458 other transcriptional cascades. In interesting association with the above data of *Tall*  
459 expression in the presence and absence of EKLF, the ChIP-chip analysis identified two  
460 regions with significant reads of EKLF-binding, one of which (region I,114,551,700 -  
461 114,552,900 on chromosome 4, NCBI 36/mm8) was located around the *Tall* gene in  
462 E14.5 fetal liver cells (Fig. 4A, Table S1, Table S2A). In mouse erythroid cells, the *Tall*  
463 gene encodes a *Tall* mRNA isoformA (Fig. 4B) consisting of 5 exons, with the most  
464 upstream exon1 located at 115,056,426 - 115,056,469 (NCBI 36/ mm8). However, no  
465 CCAAT box or TATA box or CACCC box could be found within 300 bp upstream of this  
466 exon 1. Instead, we found these motifs in a region ~ 860 bp upstream of isoform A exon 1  
467 (Fig. 4B and 4C; see also sequence in Fig. 5A). We thus suspected that exon 1 of *Tall*  
468 gene might be longer than currently documented in the database Alternatively, there might  
469 be another exon upstream of the exon 1 of isoform A.

470 To solve the issue, we carried out semi-quantitative RT-PCR analysis of MEL cell  
471 RNAs using different sets of primers. As shown in the bottom panels of Fig. 4B, use of  
472 the forward primer PF-3 with any one of 4 different reverse primes (AR-1, AR-2, AR-3,  
473 and AR-4) would not generate a RT-PCR band on the gel. On the other hand, the use of  
474 the forward primer PF-1 or PF-2 together with the 4 reverse primers generated RT-PCR  
475 bands the lengths of which were consistent with the existence of an exon (115,055,766 -  
476 115,056,469, NCBI 36 / mm8) consisting of the previously known isoform A exon 1 at its  
477 3' region (the diagram, Fig. 4B). Based on these RT-PCR data and the common distance  
478 (25-27 bp) between the promoter TATA box and transcription start site(s) of polymerase  
479 II-dependent genes, we suggest a map of the promoter region of *Tall* gene upstream of  
480 the newly identified exon1, which contains the TATA box at -28, two CCAAT boxes at

481 -133 and -57, and three CACCC boxes (-788, -710 and -185) upstream of transcription  
482 start site or TSS (Figs. 4C and 5A).

483 To validate the *in vivo* binding of EKLF in the newly identified *Tall* promoter, we  
484 carried out ChIPq-PCR analysis. As shown in Fig. 4C, use of four different sets of primers  
485 spanning different regions upstream and downstream of the *Tall* transcription start site  
486 (TSS) indicated EKLF-binding to region b containing the distal CACCC boxes E1 at  
487 -788/ E2 at -710 and to region c containing the proximal CACCC box E3 at-185.

#### 488 **Binding *in vivo* of EKLF to the proximal CACCC box of *Tall* promoter- Genomic** 489 **footprinting analysis**

490 In order to examine whether EKLF indeed bound to the proximal CACCC box of the  
491 *Tall* promoter in differentiated erythroid cells, we next carried out genomic footprinting  
492 assay of the *Tall* promoter in MEL cells before and after DMSO induction (Fig. 5). As  
493 shown, upon DMSO induction of the MEL cells, genomic footprints appeared at the  
494 distal CACCC box E1 and more prominently the proximal CACCC box E3 at-185 (Fig. 5).  
495 On the other hand, the distal CACCC box E2 at -710 was not protected in MEL cells with  
496 or without DMSO induction. Notably, the intensities of gel bands at -133, -132, -57, and  
497 -56 appeared to be enhanced upon DMSO induction, suggesting binding of factor(s) at the  
498 two CCAAT boxes as well (Fig. 5). These genomic footprinting data support the scenario  
499 that EKLF positively regulates the *Tall* promoter activity through binding mainly to the  
500 proximal promoter CACCC box E3. This would facilitate the recruitment of other factors  
501 including the CCAAT box-binding protein(s) to the *Tall* promoter.

502

#### 503 **Requirement of the proximal CACCC motif for transcriptional activation of the** 504 ***Tall* promoter by EKLF**

505 To investigate whether EKLF was indeed an activator of *Tall* gene transcription  
506 through binding to the proximal CACCC promoter box, we constructed a reporter plasmid

507 *pTall*-luc in which the *Tall* promoter region from -900 to -1 was cloned upstream of the  
508 luciferase reporter. Three mutant reporter plasmids, *pTall*(Mut E1)-Luc, *pTall*(Mut  
509 E2)-Luc, and *pTall*(Mut E3)-Luc, were also constructed in which the CACCC box E1, E2,  
510 or E3 was mutated (Fig. 6A). Human 293T cells were then co-transfected with one of  
511 these 4 reporter plasmids plus an expression plasmid pFlag-EKLF. As shown in Fig. 6B,  
512 the luciferase reporter activity in cells co-transfected with *pTall*-Luc, *pTall*(Mut E1)-Luc  
513 or *pTall*(Mut E2)-Luc increased in an Flag-EKLF dose-dependent manner. However,  
514 mutation at the E3 box of the reporter plasmid *pTall*(Mut E3)-Luc prohibited this increase.  
515 This result in combination with the genomic footprinting data of Fig. 5 demonstrate  
516 explicitly that binding of EKLF to the proximal CACCC box E3, but not the distal E1 or  
517 E2 box, in differentiated erythroid cells is required for transcriptional activation of the  
518 *Tall* promoter.

## 519 DISCUSSION

520 A well-coordinated group of transcription factors regulate similar or distinct sets of  
521 target genes, which build up the diverse functional networks and biological pathways  
522 governing the process of erythropoiesis. Among these factors are GATA1, FOG1, FLI1,  
523 PU.1, TAL1/SCL, and EKLF (2-4, 10). Previously, global analyses by gene expression  
524 profiling with use of the microarrays have suggested the potential target genes and genetic  
525 pathways that function in erythropoiesis, as regulated by GATA1, TAL1/SCL, and EKLF  
526 (17, 18, 30, 37, 40, 55). Later, ChIP analysis in combination with next-generation  
527 sequencing and microarray hybridization have further provided lists of genes that could be  
528 regulated directly, through DNA-binding, by these factors (28, 29, 39, 40,56). Among the  
529 factors the potential regulatory targets of which have been studied globally is EKLF. In  
530 particular, the two sets of ChIP-Seq analyses have each provided a set of direct target  
531 genes of EKLF in the mouse fetal liver cells (28, 29). The change of binding of EKLF to  
532 its potential gene targets during differentiation from erythroid progenitors to erythroblasts  
533 in the E13.5 fetal liver has also been analyzed (29). However, these two studies have  
534 displayed divergent data with respect to the identities of genes directly regulated by  
535 EKLF.

536 In this study, we have analyzed the regulatory functions of EKLF in E14.5 mouse  
537 fetal liver cells by combined use of genome-wide expression profiling and promoter  
538 ChIP-chip assay. Unexpectedly, the number of direct gene targets (1,866), as defined by  
539 the occupancy of EKLF within -3.75kb to +0.75kb relative to TSS (1.2 fold enrichment)  
540 and change >1.4 fold of the expression levels upon depletion of *Eklf* in the gene knockout  
541 mice, are significantly higher than those derived from Tallack et al, (28) and Pilon et al.  
542 (29). As shown in Fig. S7A, of the 1,866 EKLF target genes that we have identified, 257  
543 genes (13.7%) overlap with the data set from Tallack et al. (28) and 231 genes (12.3%)  
544 overlap with the data set from Pilon et al. (29). Furthermore, the number of overlapping  
545 genes between those two data sets was only 199. Moreover, among the direct targets  
546 identified in the 3 studies, only 55 (2.9% of 1,866) are in common (Fig. S7A). The  
547 inconsistencies of the conclusions among the 3 groups with respect to the direct target

548 genes of EKLF likely result from the uses of different antibodies, i.e. anti-EKLF from  
549 different sources vs. anti-HA, different approaches, ie. microarray hybridization vs.  
550 RNA-Seq and ChIP-chip vs. ChIP-Seq., different developmental stages, i.e. E13.5 vs.  
551 E14.5, of the embryos analyzed, different mouse strains, i.e. WT vs. HA-EKLF knock-in  
552 mice, different cell types, i.e. whole fetal liver vs. the progenitors/erythroblasts, and  
553 finally, analysis using different peak calling methods. Moreover, we have used 1.4 fold as  
554 the cutoff line, rather than 2 fold chosen by the other two groups (17, 29, 30), when  
555 comparing the WT and *Eklf*<sup>-/-</sup> expression profiles. This lower cutoff line may have allowed  
556 us to find more candidate targets that display subtle expression differences but have  
557 prominent functional significance. As expected, use of a higher cut-off line, i.e. 2-fold  
558 instead of 1.4 fold, for analysis of our ChIP-Chip and microarray data decreased the  
559 overlap between our list of direct target genes of EKLF and those derived from the other 2  
560 studies (Supplementary Fig. S7B).

561 One surprising outcome of our genome-wide study is the existence of a positive  
562 feedback loop between the two well-known erythroid-enriched transcription factors,  
563 EKLF and TAL1, in early erythroid differentiation. Both factors very likely promote the  
564 transition from pro-erythroblasts (Pro-E) to basophilic erythroblasts (Baso-E), as initially  
565 suggested by the fact that genetic ablation of either gene in mice causes loss of erythroid  
566 cell types beyond the stage of Baso-E (15, 34). Later studies including the use of whole  
567 genome ChIP-Seq have further supported *Eklf* being a downstream target of TAL1 (39,  
568 40). By loss-of-function analysis, we show that EKLF also positively regulates the  
569 expression of *Tall* during erythroid differentiation (Fig. 3). In particular, induced  
570 depletion of *Eklf* drastically lowers the expression level of *Tall* in DMSO-induced MEL  
571 cells (Fig 3C). The combined data from the ChIP-chip, genomic footprinting, and  
572 transient reporter assays further indicate that EKLF activates *Tall* gene transcription  
573 through binding to the proximal CACCC box in the newly identified *Tall* promoter (Figs.  
574 4 and 5). Consistent with this scenario of mutual activations of *Tall* and *Eklf*, the mRNAs  
575 of *Tall* and *Eklf* are both progressively up-regulated during erythroid differentiation of the  
576 primary mouse fetal liver cells (57). Thus, our finding of the positive regulation of *Tall*  
577 gene by EKLF demonstrates the existence of a *Tall-Eklf* positive feedback loop that

578 promotes the mammalian erythroid differentiation in a tightly regulated time window,  
579 from the transition of Pro-E to Baso-E of the erythroid lineage.

580 We propose the following scenario for the mutual activation of *Tal1* and *Eklf*, and the  
581 functional consequences of this positive feedback loop during erythroid differentiation.  
582 TAL1 is a predominant transcriptional factor responsible for the origin of the definitive  
583 hematopoietic stem cells as well as the differentiation of the erythroid/ megakaryocytic  
584 lineages. Its expression pattern spans the HSC cells, the subsequent multipotent  
585 progenitors, as well as the erythroid/ megakaryocytic lineages (58). On the other hand,  
586 EKLF is expressed in the erythroid cells, megakaryocytes, hematopoietic stem cells (HSC),  
587 as well as in hematopoietic progenitors including MEP, GMP, and CMP (6, 59, Bio GPS). In the  
588 erythroid lineage at the BFU-E/CFU-E/Pro-E stages, the two factors are already expressed  
589 at basal levels. EKLF is retained by FOE in the cytosol (26), while TAL1 protein  
590 positively regulates the expression of *Eklf*, as suggested by the previous reporter assay (41)  
591 and ChIP-Seq data of TAL1 binding on the *Eklf* promoter in BFU-E/CFU-E/Pro-E (39,  
592 40). When the cells enter the Baso-E stage, EKLF protein is released from its physical  
593 interaction with FOE in the cytoplasm and imported into the nucleus (26). The imported  
594 EKLF binds to the E3 box of the *Tal1* promoter to enhance the promoter activity of *Tal1*  
595 (Fig. 5 and 6). This positive feedback loop would rapidly amplify both factors during  
596 erythroid terminal differentiation. As a result, the EKLF-mediated activation of *Tal1* may  
597 act as a valve that facilitates the commitment of the erythroid lineage from MEP through  
598 promoting the differentiation transition from Pro-E to Baso-E, thus sustaining the process  
599 after Baso-E. Furthermore, there is a high frequency of co-occupancy of EKLF and TAL1  
600 in a number of promoters that are active in erythroid cell lines or erythroid tissues (Table  
601 4; 28-30). Thus, the *Eklf/Tal1* loop would irreversibly promote erythroid terminal  
602 differentiation through the up-regulation of not only *Eklf* and *Tal1*, but also their mutual  
603 downstream targets that are crucial for erythroid differentiation, such as *Hba*, *Hbb*, *E2f2*,  
604 *Gypa*, *Epb4.1*, and *Alas2*, among others. For the latter process, the EKLF and TAL1  
605 proteins may work within the same transcriptional complex(es) which binds to the  
606 composite CACCC box-E box in the promoters of these downstream targets (51).



607           In sum, positive feedback loops of transcriptional regulation are essential for the  
608 progression of different physiological processes, as shown previously for *c-kit* with *Tal1*  
609 in the survival and clonal expansion of the progenitor hematopoietic cells (60), early B  
610 cell factor (EBF) with MyoD in the commitment and differentiation of *Xenopus* muscle  
611 cells (61), and *c-Myc* with *Sox2* in the self-renewal of mouse multipotent otic progenitor  
612 cells (62), etc. In comparison to the above cases, the cooperation between EKLF and  
613 TAL1 in the promotion of erythroid differentiation provides an unique case for ensuring  
614 the commitment to erythroid differentiation among the multiple lineages of the  
615 hematopoietic system.

616

## 617 **ACKNOWLEDGEMENTS**

618 We thank our laboratory colleagues Yu-Chi Chou, Keh-Yang Wang and An-Chun  
619 Lee for providing us various reagents and advices. The generosity by Dr. François Morlé  
620 at Université de Lyon, Lyon, France in sharing the stable MEL cell clones 4D7/2M12 and  
621 the experimental procedures is deeply appreciated. We also thank Dr. Shu-Yun Tung at  
622 Genomics Core Facility, Institute of Molecular Biology, Academia Sinica for her help  
623 with the analysis of Mouse Genome Array 430A 2.0 (Affymetrix, Inc.). This research was  
624 supported by grants from the National Health Research Institute and the Academia Sinica  
625 (AS), Taipei, Taiwan, Republic of China. The works on bioinformatics were supported  
626 by Mathematics in Biology Group of Institute of Statistical Science, AS and by grants  
627 from Academia Sinica, AS-100-TP-AB & AS-104-TP-A07. C.-K. James Shen was an  
628 NSC Frontier of Science Awardee and AS senior investigator Awardee.

629

## 630 **AUTHORSHIP CONTRIBUTIONS**

631 C.-H. Hung, Y.-S. Huang, T.-L. Lee, and K.-C. Yang contributed equally to this work;  
632 Y.-S. Huang and J.-H. Hung designed and performed the experiments and analyzed the  
633 data regarding to the regulatory relationship between *Eklf* and *Tall*; T.-L. Lee, K.-C.  
634 Yang, and S. Yuan performed the whole-genome analyses of datasets obtained from  
635 NimbleGen ChIP-chip assay and Affymetrix gene expression profiling. S.-C. Wen  
636 performed the genomic footprinting analysis. J.-H. Hung, Y.-C. Shyu, M.-J. Lu, and S.-C.  
637 Wen carried out the validation experiments of the data from whole-genome analyses. Y.-S.  
638 Huang, J.-H. Hung, T.-L. Lee, S. Yuan, and C.-K. J. Shen developed the project and  
639 wrote the manuscript.

640 **Figure 1. Identification of EKLF target genes by global gene expression profiling**

641 (A) Left panels, representative appearance of E14.5 embryos of wild-type and  
642 *Eklf*<sup>-/-</sup> mice. Right panels, Western blotting patterns of EKLF protein in E14.5  
643 fetal livers. Actin was used as the gel loading control. (B) Scatter plot comparing  
644 the gene expression profiles of E14.5 fetal liver cells of WT and *Eklf*<sup>-/-</sup> mice by  
645 Affymatrix array hybridization. Each gene on the arrays is displayed as a single  
646 dot on a logarithmic (log<sub>2</sub>) graph. The genes up-regulated and down-regulated  
647 by EKLF are indicated by the red and blue dots, respectively. (C) Overview of  
648 the workflow of ChIP-chip and microarray expression profiling. The flow chart  
649 illustrates the procedures used for analysis of the NimbleGen promoter  
650 ChIP-chip data and Affymatrix differential expression profiling data. The  
651 number of genes (SEQ\_ID or Probe\_Set) after data processing at each step is  
652 indicated in parentheses. (D) The Venn diagram showing the overlapping  
653 between gene sets derived from the microarray hybridization analysis (6,975  
654 genes) and ChIP-chip analysis (4,578 genes), respectively, of E14.5 fetal liver  
655 cells of WT and *Eklf*<sup>-/-</sup> mice.

656

657 **Figure 2. Chromosome distribution patterns from global analysis of direct target**  
658 **genes of EKLF in E14.5 fetal liver cells**

659 (A) The numbers of the putative EKLF-bound promoters on the different  
660 mouse chromosomes. (B) The percentages of promoters of the individual  
661 mouse chromosomes bound with EKLF. (C) and (D) Distributions of the  
662 distances between the binding motif of TAL1 (C) or GATA1 (D) and that of  
663 EKLF on the mouse genome in E14.5 fetal liver cells. Upstream locations are  
664 indicated by the “-” sign, while the downstream locations are indicated by the  
665 “+” sign.

666

667 **Figure 3. Tall as a direct target gene of EKLF**

668 (A) Left, bar diagram of the relative mRNA levels of *Tall*, *Eklf* and *βmaj* in  
669 E14.5 fetal liver cells of the WT and *Eklf*<sup>-/-</sup> (KO) mice, as analyzed by RT-qPCR.

670 \*\*\*  $p < 0.001$  by t test. Error bars, S.E.M. Middle panels and right histogram  
671 diagram, Western blotting analysis of TAL1 and EKLf in E14.5 fetal livers of  
672 WT and *Eklf*<sup>-/-</sup> (KO) mice. Tubulin was used as the loading control. \*\*\*  $p <$   
673  $0.001$  by t test. Error bars, STD. **(B)** Top, expression levels of *Tall* and *βmaj* in  
674 MEL cells without or with DMSO induction for 72 hr. The gel patterns of the  
675 semi-quantitative RT-PCR bands are shown on the left, and the histograms of  
676 the statistical analysis of the data are shown on the right. \*  $p < 0.05$ , \*\*  $p < 0.01$ ,  
677 and \*\*\* $p < 0.001$  by t test. Error bars, S.D. Bottom, Western blotting analysis of  
678 the levels of TAL1 protein in MEL cells during DMSO-induced differentiation.  
679 Tubulin was used as the loading control. The statistical analysis of the data is  
680 shown in the bar diagrams on the right. \*\*  $p < 0.01$  by t test. Error bars, S.D. **(C)**  
681 Analysis of gene expression in 4D7 and 2M12 cells without and with  
682 doxycycline (Dox)-induced expression of *Eklf* shRNA. The cells without or  
683 with induction by DMSO for 48 hr were treated with doxycycline. The levels of  
684 EKLf protein in the whole cell extracts were then analyzed by Western blotting,  
685 as exemplified in the upper right panels. Tubulin was used as the loading  
686 control. RT-PCR analysis showed that knockdown of EKLf reduced the levels  
687 of total *Tall* mRNA and *βmaj* mRNA in DMSO-induced cells, as exemplified  
688 in the upper left panels and statistically analyzed in the two histogram diagrams  
689 below. The gel band signals were all normalized to that of actin. \*  $p < 0.05$ , \*\*  $p$   
690  $< 0.01$ , and \*\*\* $p < 0.001$  by student t test. Error bars, S.D.

691

692 **Figure 4. Identification and characterization of the authentic exon-1 and**  
693 **promoter of *Tall* gene**

694 **(A)** ChIP-chip promoter array data around the *Tall* gene region. The black bars  
695 indicate the signals from the individual probes (“Binding Signals”). The blue  
696 regions I and II indicate the EKLf-binding signals from ChIP-chip promoter  
697 array analysis of two different mouse E14.5 fetal liver samples (“Binding  
698 Peaks”). The yellow region indicates the sequence id (SEQ\_ID). **(B)** RT-PCR  
699 validation of the newly identified exon 1 of *Tall* mRNA. Top, maps of the

700 newly identified exon structure of *Tall* mRNA in comparison to that of *Tall*  
701 isoform A. The exons 1-5 are represented by the black boxes. Middle, maps of  
702 the exon-1 of *Tal* mRNA and *Tall* isoform A, respectively, are shown above the  
703 primers used for RT-PCR analysis of the *Tall* mRNA. The sequences of the  
704 reverse primers AR-1 and AR-2 are derived from the exon 1 of *Tall* isoform A.  
705 AR-3 is derived from exon 2 sequence. The reverse prime AR-4 is across exons  
706 1 and 2. The sequences of the forward primers PF-1 and PF-2 are from the  
707 predicted new exon-1, while PF-3 is from the upstream region. Bottom, gel  
708 band patterns of RT-PCR analysis of DMSO-induced MEL cell RNAs using  
709 different sets of PCR primers. (C) ChIP-qPCR analysis of EKLF-binding to the  
710 *Tall* promoter. The map of the *Tall* promoter region is shown on the left, with  
711 the CACCC boxes (E1, E2, E3), CCAAT boxes (C1, C2), the TATA box and  
712 the transcription start site (TSS, +1) indicated. The 4 regions (a, b, c and d) are  
713 bracketed by the 4 primer sets used in qPCR analysis of chromatin from  
714 DMSO-induced MEL cells immunoprecipitated with anti-EKLF. The relative  
715 folds of enrichment of the chromatin DNA samples pulled down by anti-EKLF  
716 are calculated as the Cq values over those derived from use of the IgG and  
717 shown in the right histogram. Error bars represent standard deviations from  
718 3~7 biological repeats. The statistical significance of the difference between  
719 experimental and control groups was determined by the two-tailed  
720 Student *t* test, \*  $p < 0.05$ .

721

722 **Figure 5. Genomic footprinting analysis of the promoter of *Tall* gene in MEL cells**

723 (A) The protected bases (○) and hyper-reactive bases (●) of the *Tall* promoter  
724 region in MEL cells after DMSO induction, as deduced from the in vivo DMS  
725 footprinting analysis, are labeled on the DNA sequence. The footprinting  
726 pattern indicates the binding of EKLF on the E3 box. (B) The representative  
727 autoradiographs of the analysis of the upper strand of the *Tall* promoter region  
728 by *in vivo* DMS protection and LMPCR assay are shown. Locations of

729 different factor- binding motifs/ boxes, i.e., E1, E2, E3, CCAAT, ATAAA, are  
730 indicated on the right of the gel patterns. Numbers on the left correlate with  
731 those indicated on the sequence in (A). The patterns in the N and INV lanes are  
732 the results from *in vitro* and *in vivo* DMS cleavages, respectively. Only those  
733 residues consistently showing differences from the controls are indicated. The  
734 sizes of the circles reflect the different extents of protection or enhancement of  
735 DMS cleavage *in vivo* vs. *in vitro*.

736

737 **Figure 6. Transactivation of *Tall* promoter by EKLF**

738 (A) Linear maps of the wild type and three mutant fragments, in which the CACCC  
739 box E1, E2, or E3 was mutated, used for construction of the reporter plasmids  
740 p*Tall*-Luc, p*Tall*(Mut E1)-Luc, p*Tall*(Mut E2)-Luc and p*Tall*(Mut E3)-Luc,  
741 respectively. (B) Luciferase reporter assay of the *Tall* promoter in 293 cells. The  
742 dose-dependence of the luciferase (Luc) activity on the amount ( $\mu$ g) of  
743 pFlag-EKLF used in co-transfection is shown in the bar diagram. \* $p < 0.05$ , \*\*\*  
744  $p < 0.001$  by t test. Error bars: STD. The elevated levels of the exogenous  
745 Flag-EKLF upon co-transfection with increased amounts of the pFlag-EKLF  
746 plasmid were validated by immunoblotting.

747

748 **FIGURE LEGENDS-S**

749

750

751 **Figure S1. Associated functional networks of up-regulated EKLF targets in E14.5**  
752 **fetal liver cells.**

753 IPA was performed on the data from comparing EKLF promoter ChIP-chip  
754 and microarray data from wild-type and *Eklf*<sup>-/-</sup> E14.5 fetal liver cells, using  
755 710 up-regulated EKLF target genes as the focus gene set. The  
756 highest-scoring network was (A) lipid metabolism, molecular transport, small  
757 molecule biochemistry and cellular development, cellular growth and

758 proliferation with the significance score 34. The secondary network was **(B)**  
759 hematological system development and function were eligible (score 26).  
760 Arrows and lines denote interactions between specific genes within the  
761 network. Solid lines indicate direct relationships, and dashed lines indicate  
762 indirect relationships.

763

764 **Figure S2. Associated functional networks of down-regulated EKLF targets in E14.5**  
765 **fetal liver cells.**

766 IPA was performed on the data from comparing EKLF promoter ChIP-chip  
767 and microarray data from wild-type and *Eklf*<sup>-/-</sup> E14.5 fetal liver cells, using  
768 1,156 down-regulated EKLF target genes as the focus gene set. The  
769 highest-scoring network was **(A)** carbohydrate metabolism, lipid metabolism,  
770 small molecule biochemistry and **(B)** cancer, tumor morphology,  
771 post-translational modification both have score 34. Other associated network  
772 functions include **(C)** developmental disorder, hereditary disorder,  
773 immunological disease; **(D)** endocrine system development and function,  
774 molecular transport, protein synthesis; and **(E)** organismal injury and  
775 abnormalities, skeletal and muscular disorders, cell death and survival.  
776 Arrows and lines denote interactions between specific genes within the  
777 network. Solid lines indicate direct relationships, and dashed lines indicate  
778 indirect relationships.

779

780 **Figure S3. RT-PCR validation of mouse fetal liver gene expression in KO embryos vs.**  
781 **WT embryos.**

782 Bar diagram of the relative mRNA levels of each candidate genes in E14.5  
783 fetal liver cells of the *Eklf*<sup>-/-</sup> (KO) mice and WT mice, as analyzed by  
784 semi-RT-PCR and normalized by *actin*. \* p < 0.05, \*\* p < 0.01, \*\*\* p < 0.001  
785 by t test. Error bars, S.E.M.

786

787 **Figure S4. Validation of ChIP-chip data by ChIP-qPCR.**

788           ChIP-Q-PCR analysis of EKLF-binding promoter regions from ChIP-chip  
789           binding peaks. The statistical analysis of the ChIP-Q-PCR data is shown in the  
790           bar diagrams. The promoter region signals were compared with IgG control. \*  
791            $p < 0.05$ , \*\*  $p < 0.01$ , \*\*\*  $p < 0.001$  by t test. Error bars, S.D.

792

793   **Figure S5. IPA identified significant canonical pathways associated with the**  
794   **up-regulated EKLF targets in E14.5 fetal liver cells.**

795           The five most significant canonical pathways obtained by IPA were (A) cell  
796           cycle control of chromosomal replication; (B) EIF2 signaling; (C)  
797           mitochondrial dysfunction,; (D) hypusine biosynthesis, and (E) tryptophan  
798           degradation III (Eukaryotic). The upregulated EKLF targets are indicated in  
799           yellow.

800

801   **Figure S6. IPA identified significant canonical pathways associated with the**  
802   **down-regulated EKLF targets in E14.5 fetal liver cells.**

803           The five most significant canonical pathways obtained by IPA were (A)  
804           insulin receptor signaling; (B) chondroitin sulfate degradation (Metazoa); (C)  
805           gap junction signaling; (D) Nitric Oxide signaling in the cardiovascular  
806           system, and (E) PDGF signaling. The down-regulated EKLF targets are  
807           indicated in yellow.

808

809   **Figure S7. Three-way Venn diagrams displaying the overlap of direct targets of**  
810   **EKLF as derived from Tallack et al. (28), Pilon et al. (29), and the current**  
811   **study.**

812           (A) Diagram with cut-off line of 1.4 fold

813           (B) Diagram with cut-off line of 2.0 fold

814



815 **LIST of SUPPLEMENTARY TABLES**

816

817

818 **Supplementary Table 1.** List of EKLF-bound regions on mouse genome.

819

820 **Supplementary Table 2A.** List of EKLF direct downstream targets generated from  
821 matching between the Affymetrix expression profiling  
822 comparing wild-type and *Eklf*<sup>-/-</sup> (KO) mice and the NimbleGen  
823 ChIP-chip promoter array.

824

825 **Supplementary Table 2B.** List of EKLF up-regulated genes after filtering with effect  
826 sizes.

827

828 **Supplementary Table 2C.** List of EKLF down-regulated genes after filtering with effect  
829 sizes.

830

831 **Supplementary Table 3A.** List of top enriched network functions from up-regulated  
832 genes derived from Ingenuity IPA software.

833

834 **Supplementary Table 3B.** List of top enriched network functions from down-regulated  
835 genes derived from Ingenuity IPA software.

836

837 **Supplementary Table 4A.** List of molecular and cellular functions from up-regulated  
838 genes derived from Ingenuity IPA software.

839

840 **Supplementary Table 4B.** List of molecular and cellular functions from down-regulated  
841 genes derived from Ingenuity IPA software.

842

843 **Supplementary Table 5A.** List of significant canonical pathways from up-regulated  
844 genes derived from Ingenuity IPA software.

845

846 **Supplementary Table 5B.** List of significant canonical pathways from down-regulated  
847 genes derived from Ingenuity IPA software.

848

849 **Supplementary Table 6.** The occurrences of binding motifs of 226 transcription factors  
850 in EKLF-bound regions.

851 **Supplementary Table 7.** List of primers used in ChIP-chip data validation by ChIP-  
852 qPCR.

853

854 **Supplementary Table 8.** List of RT-PCR primers of used for validation of microarray  
855 hybridization data.

856

857 **Supplementary Table 9.** List of primers used for identification of *Tall* exon-1.

858

## 859 REFERENCES

860 1. **Orkin SH, Zon LI.** 2008. Hematopoiesis: an evolving paradigm for stem cell  
861 biology. *Cell* **132**:631-644.

862 2. **Dore LC, Crispino JD.** 2011. Transcription factor networks in erythroid cell and  
863 megakaryocyte development. *Blood* **118**:231-239.

864 3. **Dzierzak E, Philipsen S.** 2013. Erythropoiesis: development and differentiation.  
865 *Cold Spring Harb Perspect Med* **3**:a011601.

866 4. **Kerenyi MA, Orkin SH.** 2010. Networking erythropoiesis. *J Exp Med*  
867 **207**:2537-2541.

868 5. **Crispino JD, Weiss MJ.** 2014. Erythro-megakaryocytic transcription factors

- 869 associated with hereditary anemia. *Blood* **123**:3080-3088.
- 870 6. **Frontelo P, Manwani D, Galdass M, Karsunky H, Lohmann F, Gallagher PG,**  
871 **Bieker JJ.** 2007. Novel role for EKLF in megakaryocyte lineage commitment.  
872 *Blood* **110**:3871-3880.
- 873 7. **Bouilloux F, Juban G, Cohet N, Buet D, Guyot B, Vainchenker W, Louache F,**  
874 **Morle F.** 2008. EKLF restricts megakaryocytic differentiation at the benefit of  
875 erythrocytic differentiation. *Blood* **112**:576-584.
- 876 8. **Tallack MR, Perkins AC.** 2010. Megakaryocyte-erythroid lineage promiscuity in  
877 EKLF null mouse blood. *Haematologica* **95**:144-147.
- 878 9. **Siatecka M, Bieker JJ.** 2011. The multifunctional role of EKLF/KLF1 during  
879 erythropoiesis. *Blood* **118**:2044-2054.
- 880 10. **Perkins, A., Xu, X., Higgs, D.-R.,** The KLF1 Consensus Workgroup (26 members  
881 including **Shen, C.-K. J.), Patrinos, G.-P., Arnaud, L., Bieker, J.-J. and**  
882 **Philipsen, S.** 2016. “Krüppeling” erythropoiesis: an unexpected broad spectrum  
883 of human red blood cell disorders due to KLF1 variants unveiled by genomic  
884 sequencing. *Blood*, **127**, 1856-1862.
- 885 11. **Miller IJ, Bieker JJ.** 1993. A novel, erythroid cell-specific murine transcription  
886 factor that binds to the CACCC element and is related to the Krüppel family of  
887 nuclear proteins. *Molecular and Cellular Biology* **13**:2776-2786.
- 888 12. **Andrews N, Orkin S.** 1994. Transcriptional control of erythropoiesis. *Current*  
889 *Opinion in Hematology* **1**:119-124.

- 890 13. **Porcu S, Manchinu MF, Marongiu MF, Sogos V, Poddie D, Asunis I, Porcu L,**  
891 **Marini MG, Moi P, Cao A, Grosveld F, Ristaldi MS.** 2011. Klf1 affects DNase  
892 II-alpha expression in the central macrophage of a fetal liver erythroblastic island:  
893 a non-cell-autonomous role in definitive erythropoiesis. *Mol Cell Biol*  
894 **31:4144-4154.**
- 895 14. **Perkins AC, Sharpe AH, Orkin SH.** 1995. Lethal beta-thalassaemia in mice  
896 lacking the erythroid CACCC-transcription factor EKLF. *Nature* **375:318-322.**
- 897 15. **Nuez B, Michalovich D, Bygrave A, Ploemacher R, Grosveld F.** 1995.  
898 Defective haematopoiesis in fetal liver resulting from inactivation of the EKLF  
899 gene. *Nature* **375:316-318.**
- 900 16. **Hodge D, Coghill E, Keys J, Maguire T, Hartmann B, McDowall A, Weiss M,**  
901 **Grimmond S, Perkins A.** 2006. A global role for EKLF in definitive and  
902 primitive erythropoiesis. *Blood* **107:3359-3370.**
- 903 17. **Drissen R, von Lindern M, Kolbus A, Driegen S, Steinlein P, Beug H,**  
904 **Grosveld F, Philipsen S.** 2005. The erythroid phenotype of EKLF-null mice:  
905 defects in hemoglobin metabolism and membrane stability. *Mol Cell Biol*  
906 **25:5205-5214.**
- 907 18. **Chen X, Bieker JJ.** 2004. Stage-specific repression by the EKLF transcriptional  
908 activator. *Mol Cell Biol* **24:10416-10424.**
- 909 19. **Shyu YC, Wen SC, Lee TL, Chen X, Hsu CT, Chen H, Chen RL, Hwang JL,**  
910 **Shen CK.** 2006. Chromatin-binding in vivo of the erythroid kruppel-like factor,  
911 EKLF, in the murine globin loci. *Cell Res* **16:347-355.**

- 912 20. **Shyu YC, Lee TL, Wen SC, Chen H, Hsiao WY, Chen X, Hwang J, Shen CK.**  
913 2007. Subcellular transport of EKLF and switch-on of murine adult beta maj  
914 globin gene transcription. *Mol Cell Biol* **27**:2309-2323.
- 915 21. **Zhang W, Bieker JJ.** 1998. Acetylation and modulation of erythroid Krüppel-like  
916 factor (EKLF) activity by interaction with histone acetyltransferases. *Proc Natl*  
917 *Acad Sci U S A* **95**:9855-9860.
- 918 22. **Kadam S, McAlpine GS, Phelan ML, Kingston RE, Jones KA, Emerson BM.**  
919 2000. Functional selectivity of recombinant mammalian SWI/SNF subunits.  
920 *Genes Dev* **14**:2441-2451.
- 921 23. **Zhang W, Kadam S, Emerson BM, Bieker JJ.** 2001. Site-specific acetylation  
922 by p300 or CREB binding protein regulates erythroid Kruppel-like factor  
923 transcriptional activity via its interaction with the SWI-SNF complex. *Mol Cell*  
924 *Biol* **21**:2413-2422.
- 925 24. **Singleton B, Frayne J, Anstee D.** 2012. Blood group phenotypes resulting from  
926 mutations in erythroid transcription factors. *Curr Opin Hematol* **19**:486-493.
- 927 25. **Tallack M, Perkins A.** 2013. Three fingers on the switch: Krüppel-like factor 1  
928 regulation of  $\gamma$ -globin to  $\beta$ -globin gene switching. *Curr Opin Hematol*  
929 **20**:193-200.
- 930 26. **Shyu YC, Lee TL, Chen X, Hsu PH, Wen SC, Liaw YW, Lu CH, Hsu PY, Lu**  
931 **MJ, Hwang J, Tsai MD, Hwang MJ, Chen JR, Shen CK.** 2014. Tight  
932 regulation of a timed nuclear import wave of EKLF by PKC $\theta$  and FOE during  
933 Pro-E to Baso-E transition. *Dev Cell* **28**:409-422.

- 934 27. **Schoenfelder S, Sexton T, Chakalova L, Cope NF, Horton A, Andrews S,**  
935 **Kurukuti S, Mitchell JA, Umlauf D, Dimitrova DS, Eskiw CH, Luo Y, Wei**  
936 **CL, Ruan Y, Bieker JJ, Fraser P.** 2010. Preferential associations between  
937 co-regulated genes reveal a transcriptional interactome in erythroid cells. *Nat*  
938 *Genet* **42**:53-61.
- 939 28. **Tallack MR, Whittington T, Yuen WS, Wainwright EN, Keys JR, Gardiner**  
940 **BB, Nourbakhsh E, Cloonan N, Grimmond SM, Bailey TL, Perkins AC.** 2010.  
941 A global role for KLF1 in erythropoiesis revealed by ChIP-seq in primary  
942 erythroid cells. *Genome Res* **20**:1052-1063.
- 943 29. **Pilon AM, Ajay SS, Kumar SA, Steiner LA, Cherukuri PF, Wincovitch S,**  
944 **Anderson SM, Center NCS, Mullikin JC, Gallagher PG, Hardison RC,**  
945 **Margulies EH, Bodine DM.** 2011. Genome-wide ChIP-Seq reveals a dramatic  
946 shift in the binding of the transcription factor erythroid Kruppel-like factor during  
947 erythrocyte differentiation. *Blood* **118**:e139-148.
- 948 30. **Tallack MR, Magor GW, Dartigues B, Sun L, Huang S, Fittock JM, Fry SV,**  
949 **Glazov EA, Bailey TL, Perkins AC.** 2012. Novel roles for KLF1 in  
950 erythropoiesis revealed by mRNA-seq. *Genome Res* **22**:2385-2398.
- 951 31. **Robb L, Lyons I, Li R, Hartley L, Kontgen F, Harvey RP, Metcalf D, Begley**  
952 **CG.** 1995. Absence of yolk sac hematopoiesis from mice with a targeted  
953 disruption of the *scl* gene. *Proc Natl Acad Sci USA* **92**:7075-7079.
- 954 32. **Shivdasani RA, Mayer EL, Orkin SH.** 1995. Absence of blood formation in  
955 mice lacking the T-cell leukaemia oncoprotein tal-1/SCL. *Nature* **373**:432-434.

- 956 33. **D.Aplan P, Nakahara K, H.Orkin S, R.Kirsch I.** 1992. The *SCL* gene product:  
957 a positive regulator of erythroid differentiation. *EMBO J* **11**:4073-4081.
- 958 34. **Hall MA, Curtis DJ, Metcalf D, Elefanty AG, Sourris K, Robb L, Gothert JR,**  
959 **Jane SM, Begley CG.** 2003. The critical regulator of embryonic hematopoiesis,  
960 *SCL*, is vital in the adult for megakaryopoiesis, erythropoiesis, and lineage choice  
961 in CFU-S12. *Proc Natl Acad Sci U S A* **100**:992-997.
- 962 35. **Mikkola HKA, Klintman J, Yang H, Hock H, Schlaeger TM, Fujiwara Y,**  
963 **Orkin SH.** 2003. Haematopoietic stem cells retain long-term repopulating  
964 activity and multipotency in the absence of stem-cell leukaemia *SCL/tal-1* gene.  
965 *Nature* **421**:547-551.
- 966 36. **Weiss MJ, Orkin SH.** 1995. Transcription factor GATA-1 permits survival and  
967 maturation of erythroid precursors by preventing apoptosis. *Proc Natl Acad Sci U*  
968 *S A* **92**:9623-9627.
- 969 37. **Yu M, Riva L, Xie H, Schindler Y, Moran TB, Cheng Y, Yu D, Hardison R,**  
970 **Weiss MJ, Orkin SH, Bernstein BE, Fraenkel E, Cantor AB.** 2009. Insights  
971 into GATA-1-mediated gene activation versus repression via genome-wide  
972 chromatin occupancy analysis. *Mol Cell* **36**:682-695.
- 973 38. **Shimizu R, Yamamoto M.** 2012. Contribution of GATA1 dysfunction to  
974 multi-step leukemogenesis. *Cancer Sci* **103**:2039-2044.
- 975 39. **Han GC, Vinayachandran V, Bataille AR, Park B, Chan-Salis KY, Keller CA,**  
976 **Long M, Mahony S, Hardison RC, Pugh BF.** 2016. Genome-wide organization  
977 of GATA1 and TAL1 determined at high resolution. *Mol Cell Biol* **36**:157-172.

- 978 40. **Kassouf MT, Hughes JR, Taylor S, McGowan SJ, Soneji S, Green AL, Vyas P,**  
979 **Porcher C.** 2010. Genome-wide identification of TAL1's functional targets:  
980 insights into its mechanisms of action in primary erythroid cells. *Genome Res*  
981 **20**:1064-1083.
- 982 41. **Anderson KP, Crable SC, Lingrel JB.** 1998. Multiple proteins binding to a  
983 GATA-E box-GATA motif regulate the erythroid Krüppel-like factor (EKLF) gene.  
984 *J Biol Chem* **273**:14347-14354.
- 985 42. **Daftari P, Gvava NR, Shen CKJ.** 1999. Distinction between AP1 and NF-E2  
986 factor-binding at specific chromatin regions in mammalian cells. *Oncogene.*  
987 **18**:5482-5486.
- 988 43. **Mueller PR, Wold B.** 1989. In vivo footprinting of a muscle specific enhancer by  
989 ligation mediated PCR. *Science* **246**:780-786.
- 990 44. **Pfeifer GP, Steigerwald SD, Mueller PR, Wold B, Riggs AD.** 1989. Genomic  
991 sequencing and methylation analysis by ligation mediated PCR. *Science*  
992 **246**:810-813.
- 993 45. **Zhang Q, Reddy PMS, Yu C-Y, Bastiani C, Higgs D, Stamatoyannopoulos G,**  
994 **Papayannopoulou T, Shen CKJ.** 1993. Transcriptional activation of human zeta  
995 2 globin promoter by the alpha globin regulatory element (HS-40): functional role  
996 of specific nuclear factor-DNA complexes. *Mol Cell Biol* **13**:2298-2308.
- 997 46. **Wen S-C, Roder K, Hu K-Y, Rombel I, Gavva NR, Daftari P, Kuo Y-Y, Wang**  
998 **C, Shen C-KJ.** 2000. Loading of DNA-binding factors to an erythroid enhancer.  
999 *Mol Cell Biol* **20**:1993-2003.



- 1000 47. **Pilon AM, Arcasoy MO, Dressman HK, Vayda SE, Maksimova YD,**  
1001 **Sangerman JI, Gallagher PG, Bodine DM.** 2008. Failure of terminal erythroid  
1002 differentiation in EKLF-deficient mice is associated with cell cycle perturbation  
1003 and reduced expression of E2F2. *Mol Cell Biol* **28**:7394-7401.
- 1004 48. **Gregory RC, Taxman DJ, Seshasayee D, Kensinger MH, Bieker JJ,**  
1005 **Wojchowski DM.** 1996. Functional interaction of GATA1 with erythroid  
1006 Krüppel-like factor and Sp1 at defined erythroid promoters. *Blood* **87**:1793-1801.
- 1007 49. **Wadman IA, Osada H, Grütz GG, Agulnick AD, Westphal H, Forster A,**  
1008 **Rabbitts TH.** 1997. The LIM-only protein Lmo2 is a bridging molecule  
1009 assembling an erythroid, DNA-binding complex which includes the TAL1, E47,  
1010 GATA-1 and Ldb1/NLI proteins. *EMBO J* **16**:3145-3157.
- 1011 50. **Ferreira R, Ohneda K, Yamamoto M, Philipsen S.** 2005. GATA1 function, a  
1012 paradigm for transcription factors in hematopoiesis. *Mol Cell Biol* **25**:1215-1227.
- 1013 51. **Li L, Freudenberg J, Cui K, Dale R, Song SH, Dean A, Zhao K, Jothi R, Love**  
1014 **PE.** 2013. Ldb1-nucleated transcription complexes function as primary mediators  
1015 of global erythroid gene activation. *Blood* **121**:4575-4585.
- 1016 52. **Bose F, Fugazza C, Casalgrandi M, Capelli A, Cunningham JM, Zhao Q,**  
1017 **Jane SM, Ottolenghi S, Ronchi A.** 2006. Functional interaction of CP2 with  
1018 GATA-1 in the regulation of erythroid promoters. *Mol Cell Biol* **26**:3942-3954.
- 1019 53. **Crossley M, Tsang AP, Bieker JJ, Orkin SH.** 1994. Regulation of the erythroid  
1020 Kruppel-like factor (EKLF) gene promoter by the erythroid transcription factor  
1021 GATA-1. *J Biol Chem* **269**:15440-15444.

- 1022 54. **Lecoite N, Bernard O, Naert K, Joulin V, Larsen CJ, Romeo PH,**  
1023 **Mathieu-Mahul D.** 1994. GATA- and SP1-binding sites are required for the full  
1024 activity of the tissue-specific promoter of the *tal-1* gene. *Oncogene* **9**:2623-2632.
- 1025 55. **Cheng Y, Wu W, Kumar SA, Yu D, Deng W, Tripic T, King DC, Chen KB,**  
1026 **Zhang Y, Drautz D, Giardine B, Schuster SC, Miller W, Chiaromonte F,**  
1027 **Zhang Y, Blobel GA, Weiss MJ, Hardison RC.** 2009. Erythroid GATA1  
1028 function revealed by genome-wide analysis of transcription factor occupancy,  
1029 histone modifications, and mRNA expression. *Genome Res* **19**:2172-2184.
- 1030 56. **Soler E, Andrieu-Soler C, de Boer E, Bryne JC, Thongjuea S, Stadhouders R,**  
1031 **Palstra RJ, Stevens M, Kockx C, van Ijcken W, Hou J, Steinhoff C, Rijkers E,**  
1032 **Lenhard B, Grosveld F.** 2010. The genome-wide dynamics of the binding of  
1033 Ldb1 complexes during erythroid differentiation. *Genes Dev* **24**:277-289.
- 1034 57. **Pop R, Shearstone JR, Shen Q, Liu Y, Hallstrom K, Koulis M, Gribnau J,**  
1035 **Socolovsky M.** 2010. A key commitment step in erythropoiesis is synchronized  
1036 with the cell cycle clock through mutual inhibition between PU.1 and S-phase  
1037 progression. *PLoS Biol* **8**: e1000484.
- 1038 58. **Vagapova ER, Spirin PV, Lebedev TD, Prassolov VS.** 2018. The role of Tall  
1039 in hematopoiesis and leukemogenesis. *Acta Naturae* **10**:15-23.
- 1040 59. **Neuwirtova R, Fuchs O, Holicka M, Vostry M, Kostecka A, Hajkova H,**  
1041 **Jonasova A, Cermak J, Cmejla R, Pospisilova D, Belickova M, Siskova M,**  
1042 **Hochova I, Vondrakova J, Sponerova D, Kadlckove E, Novakova L,**  
1043 **Brezinova J, Michalova K.** 2013. Transcription factors Fli1 and EKLF in the

- 1044 differentiation of megakaryocytic and erythroid progenitor in 5q-syndrome and in  
1045 Diamond-Blackfan anemia. *Ann Hematol* **92**:11-18.
- 1046 60. **Lacombe J, Krosi G, Tremblay M, Gerby B, Martin R, Aplan PD, Lemieux S,**  
1047 **Hoang T.** 2013. Genetic interaction between Kit and Scl. *Blood* **122**:1150-1161.
- 1048 61. **Green YS, Vetter ML.** 2011. EBF proteins participate in transcriptional  
1049 regulation of *Xenopus* muscle development. *Dev Biol* **358**:240-250.
- 1050 62. **Kwan KY, Shen J, Corey DP.** 2015. C-MYC transcriptionally amplifies SOX2  
1051 target genes to regulate self-renewal in multipotent otic progenitor cells. *Stem*  
1052 *Cell Reports* **4**:47-60.
- 1053

1054

**Fig. 1. Identification of EKLF target genes by global gene expression profiling**

**A**

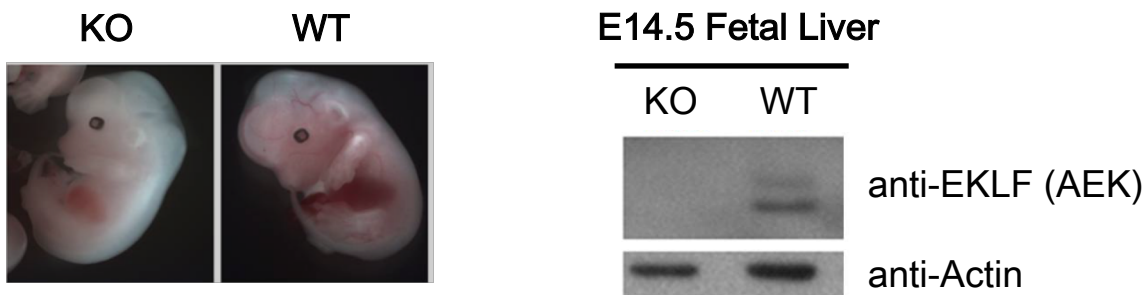

**B**

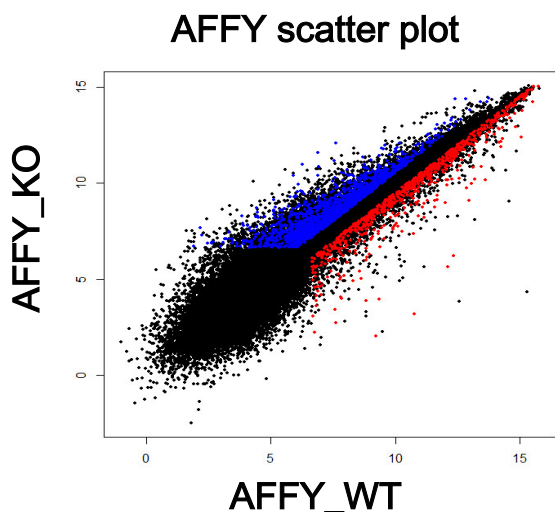

**C**

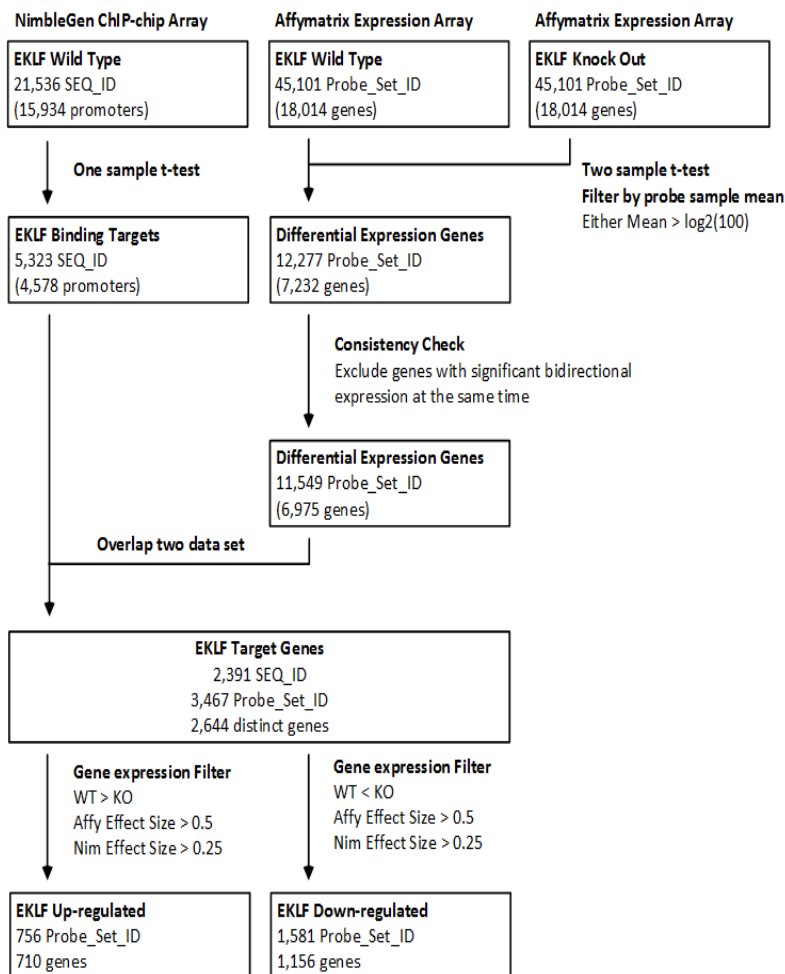

**D**

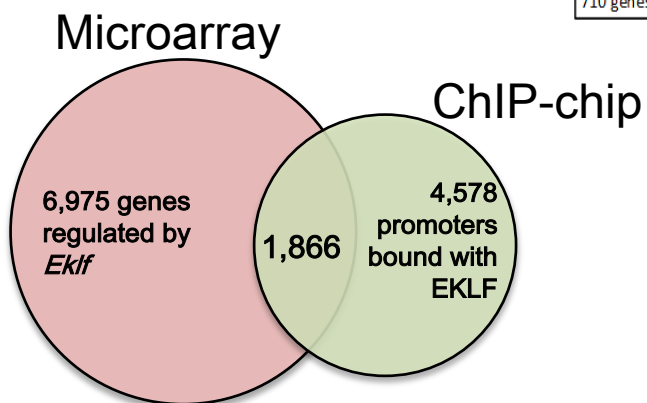

**Fig. 2. Global analysis of direct target gene promoters of EKLf in E14.5 fetal liver cells**

**A**

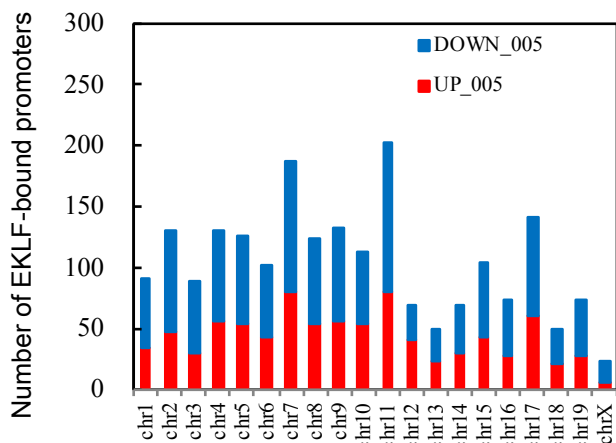

**B**

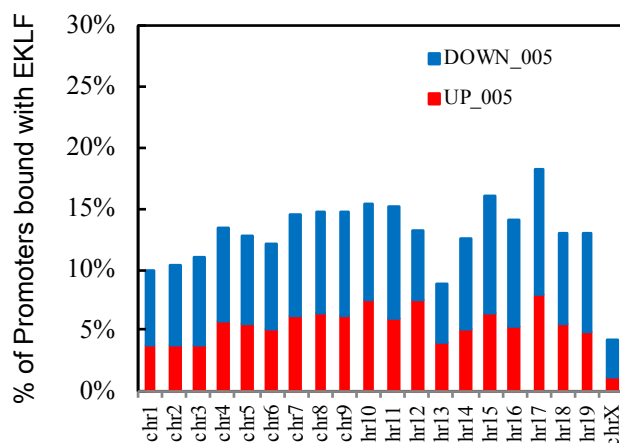

**C**

**TAL1 motif v.s. EKLf motif**

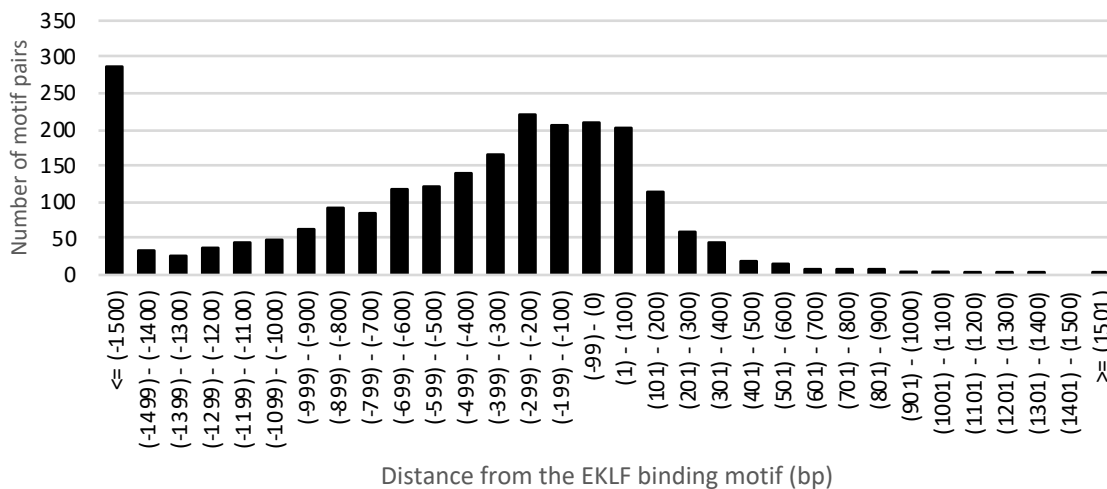

**D**

**GATA motif v.s. EKLf motif**

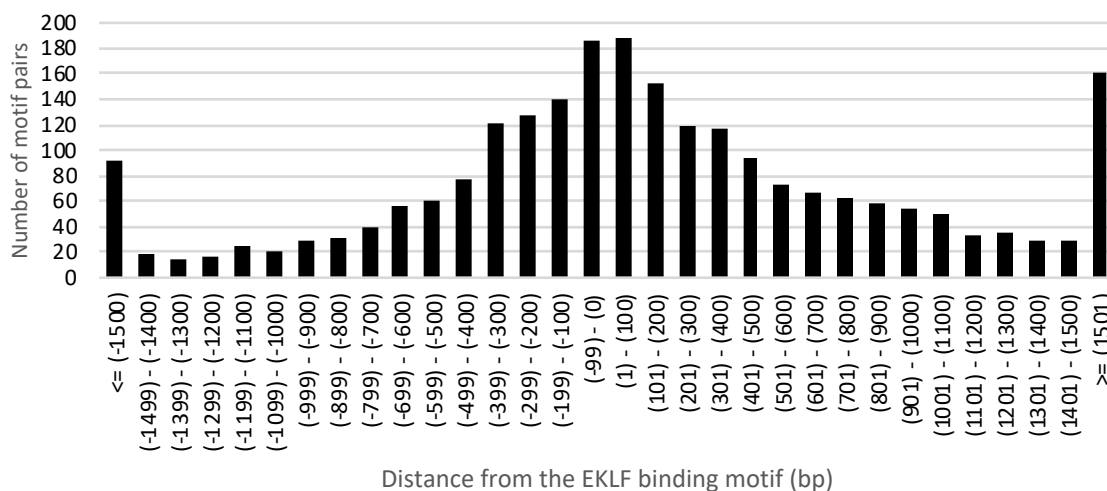

**Fig. 3. *Tal-1* as a direct target gene of EKLF**

**A**

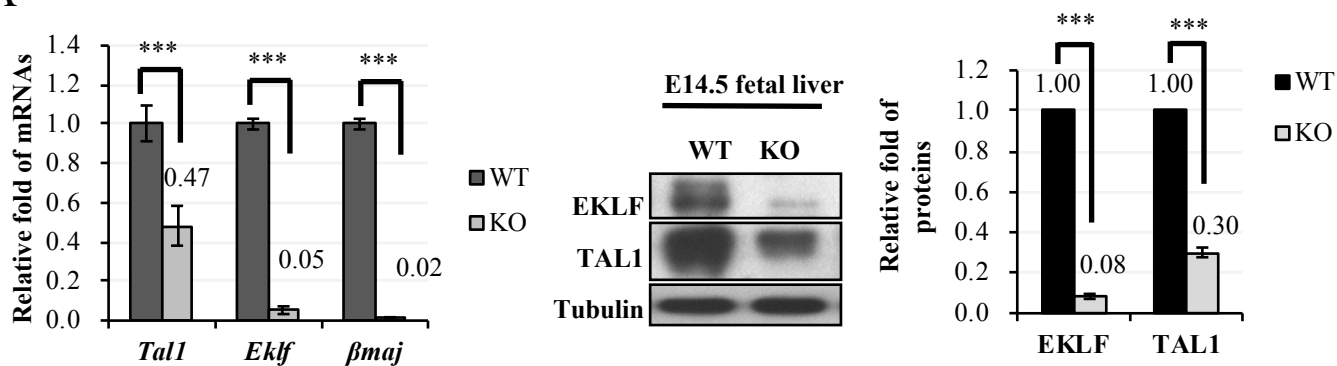

**B**

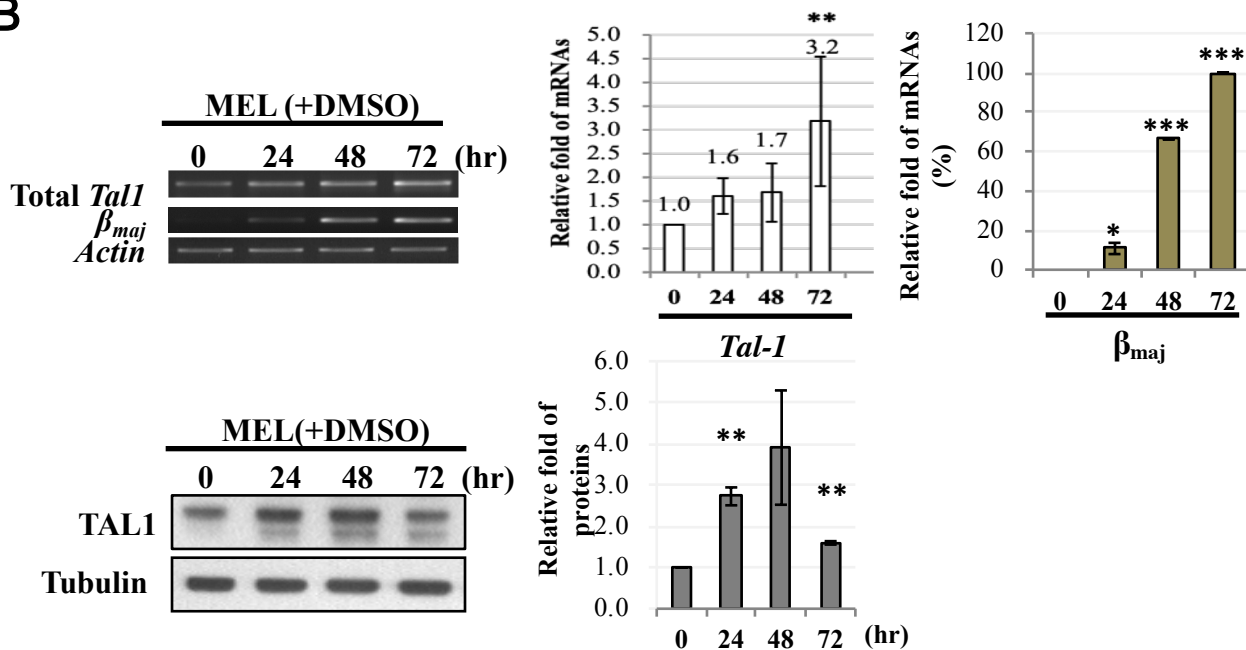

**C**

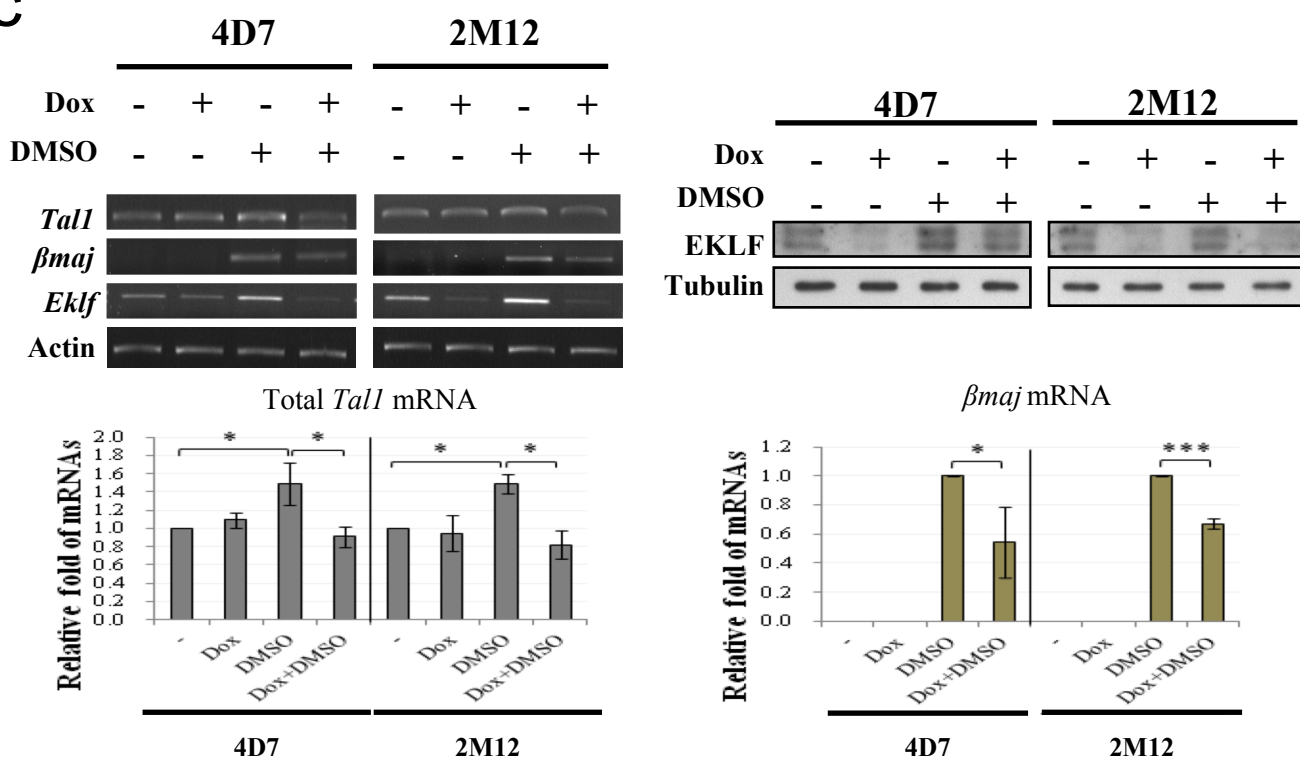

**Fig. 4. Identification and characterization of the authentic exon-1 and upstream of *Tal1* gene promoter**

**A**

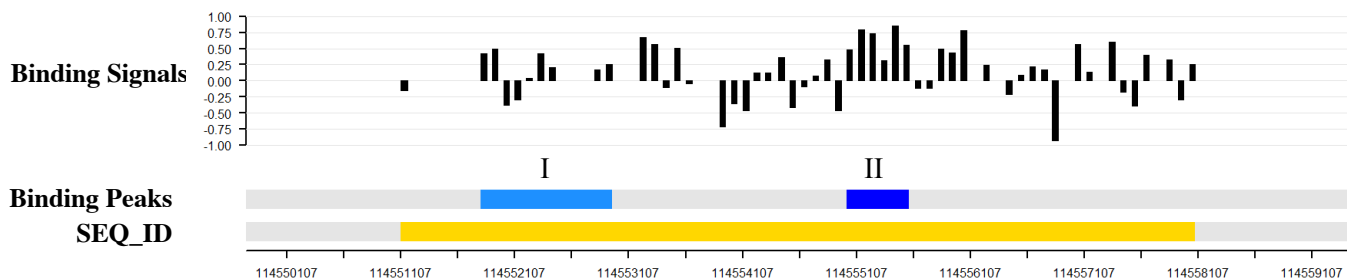

**B**

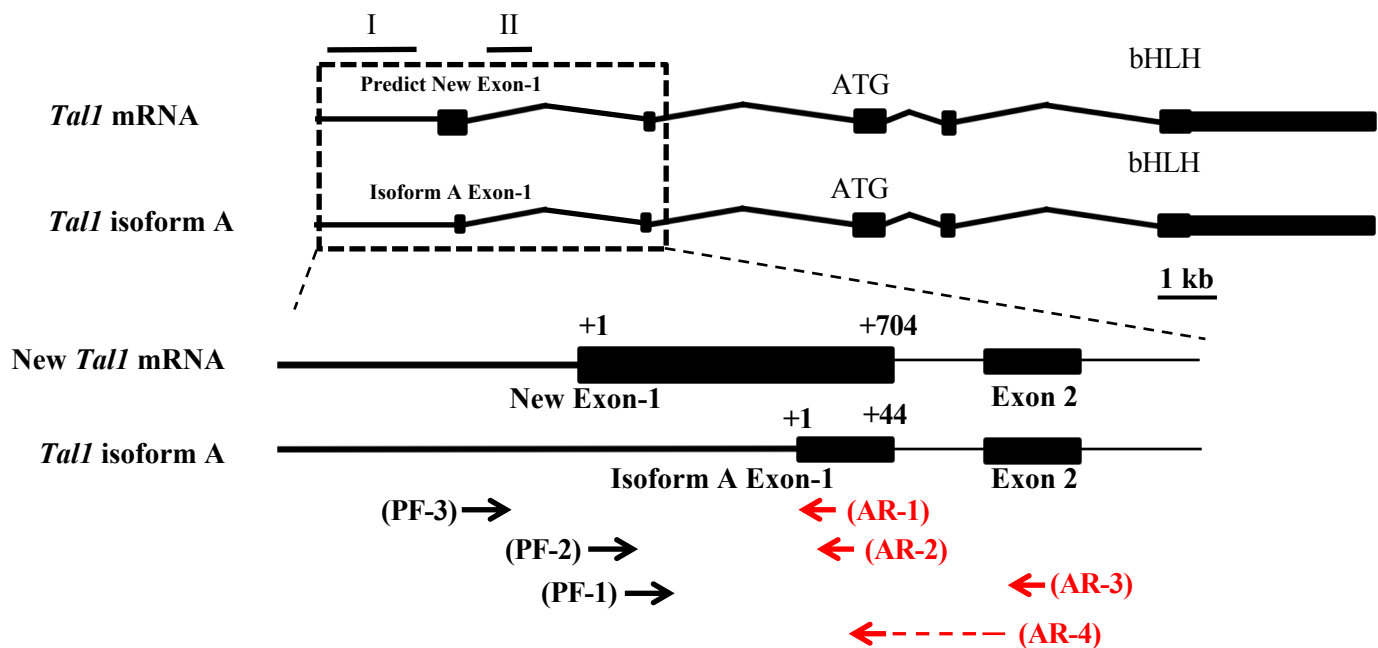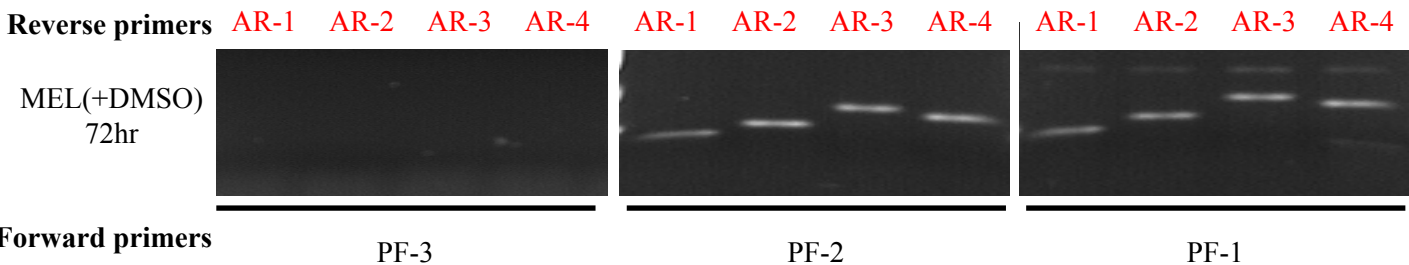

**C**

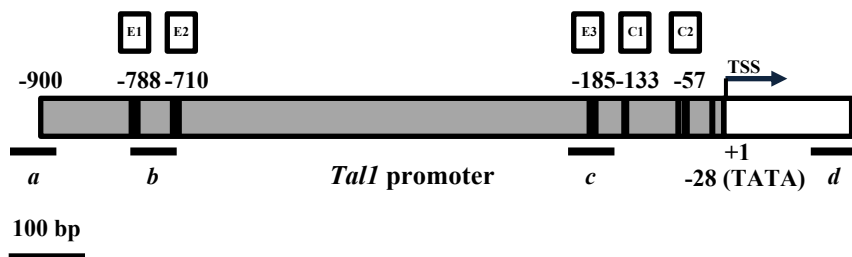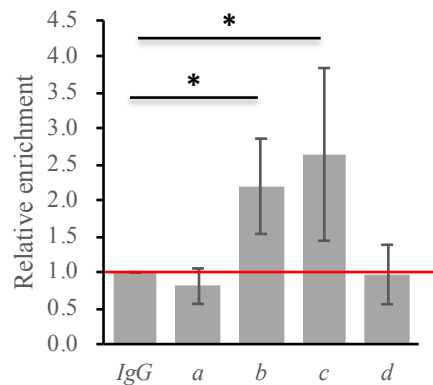



**Fig. 5. Genomic footprinting analysis of the promoter of *Ta11* gene in MEL cells**

**A**

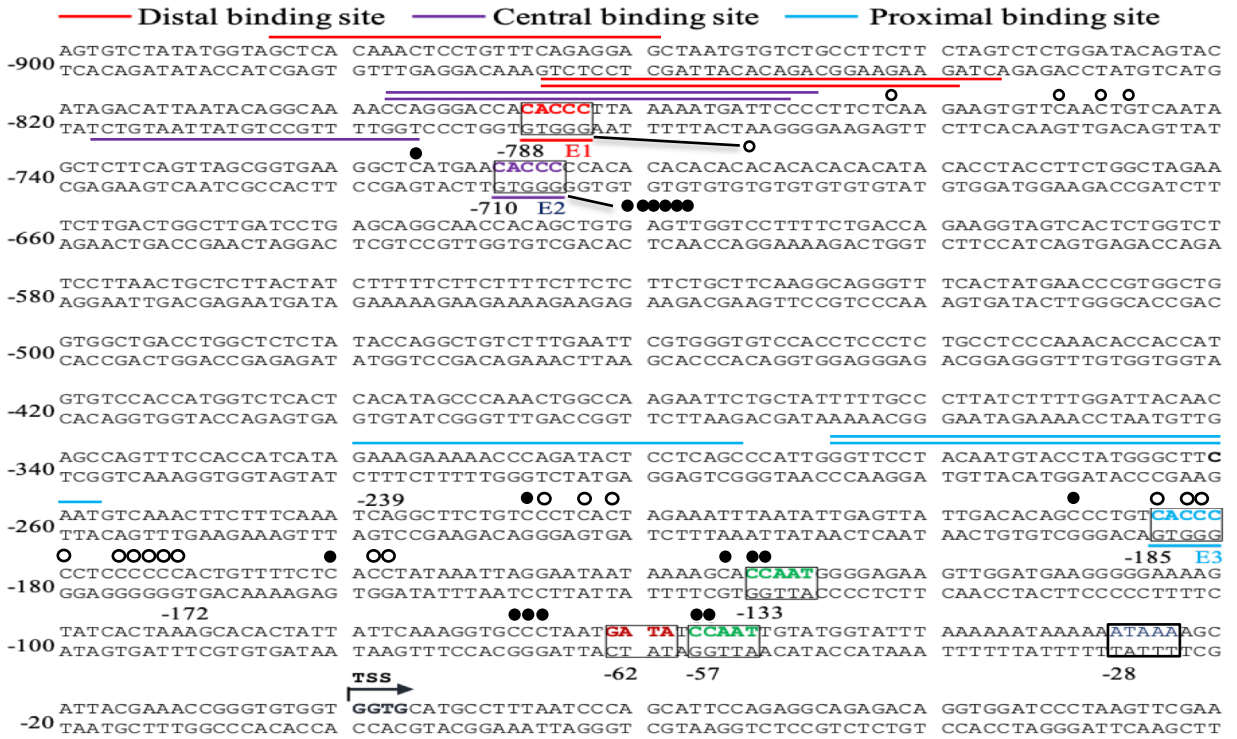

**B**

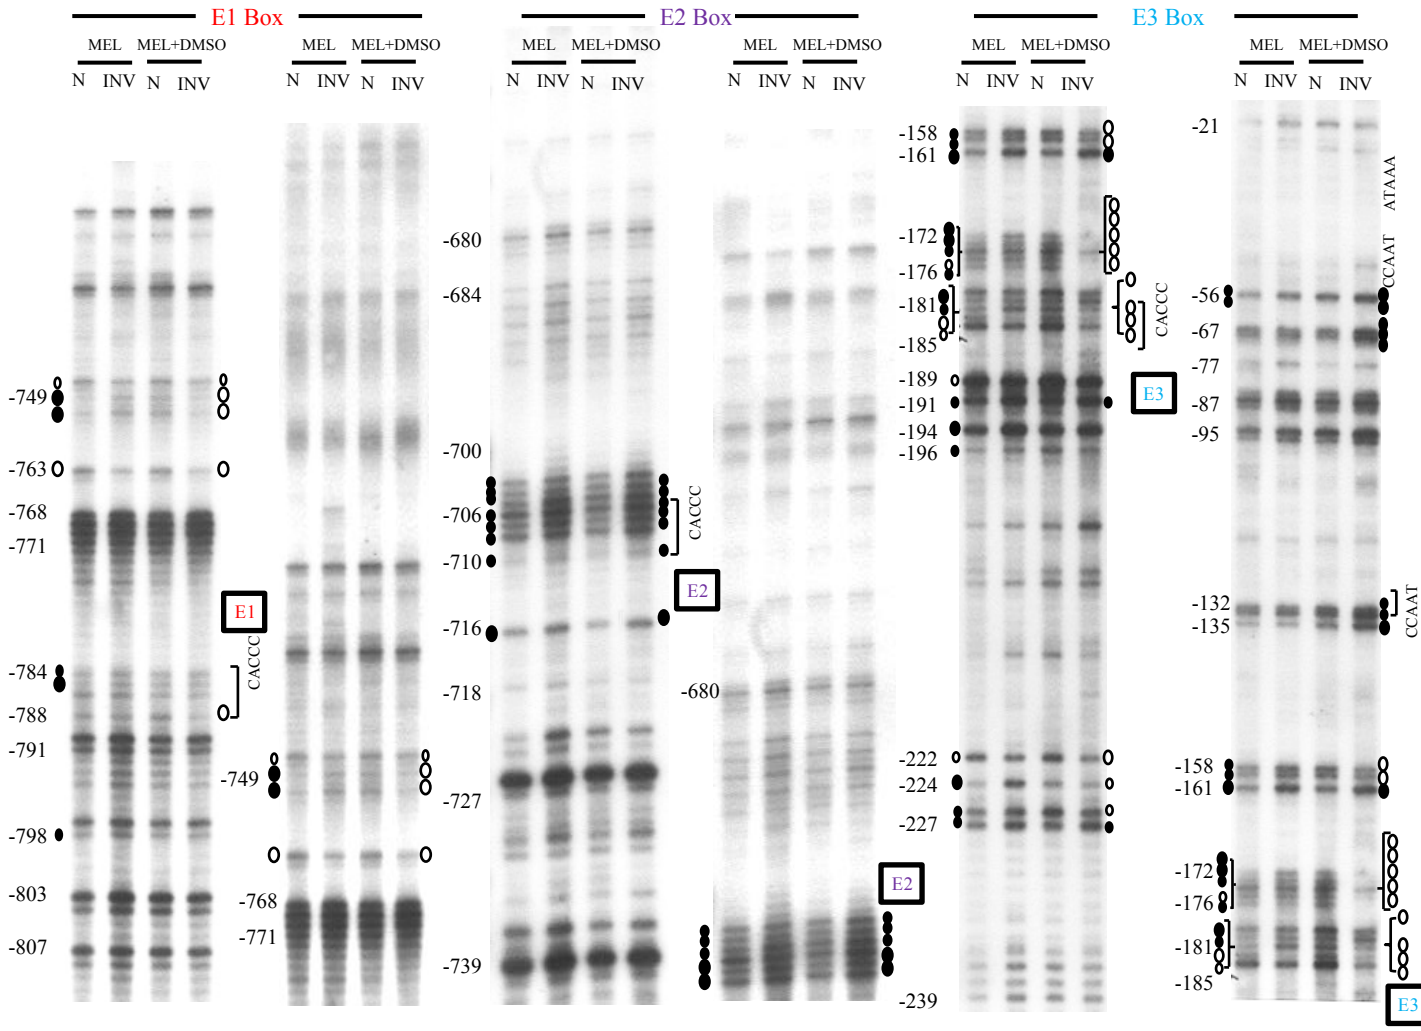

**Fig. 6. Transactivation of *Tal1* promoter by Flag-EKLF in 293T cells.**

**A**

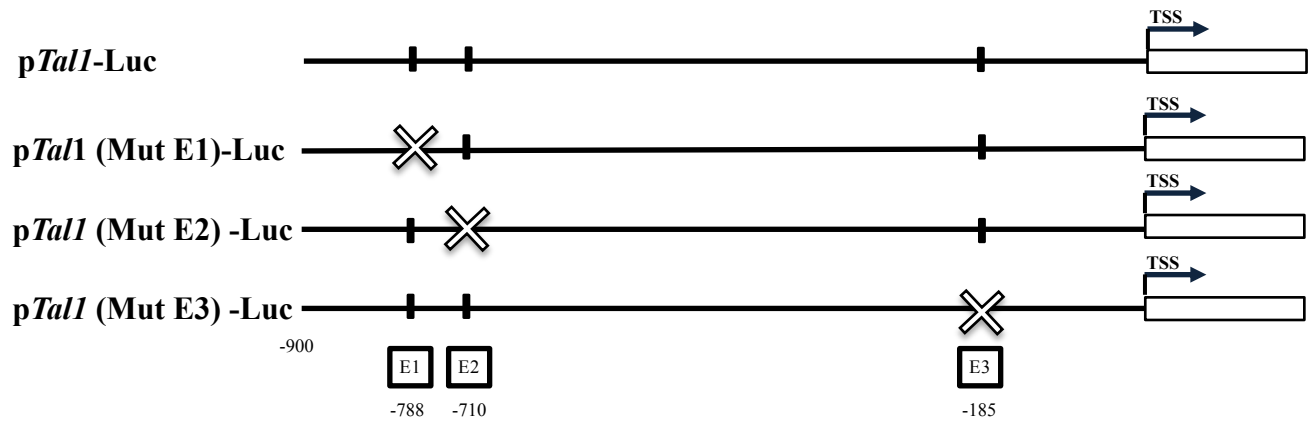

**B**

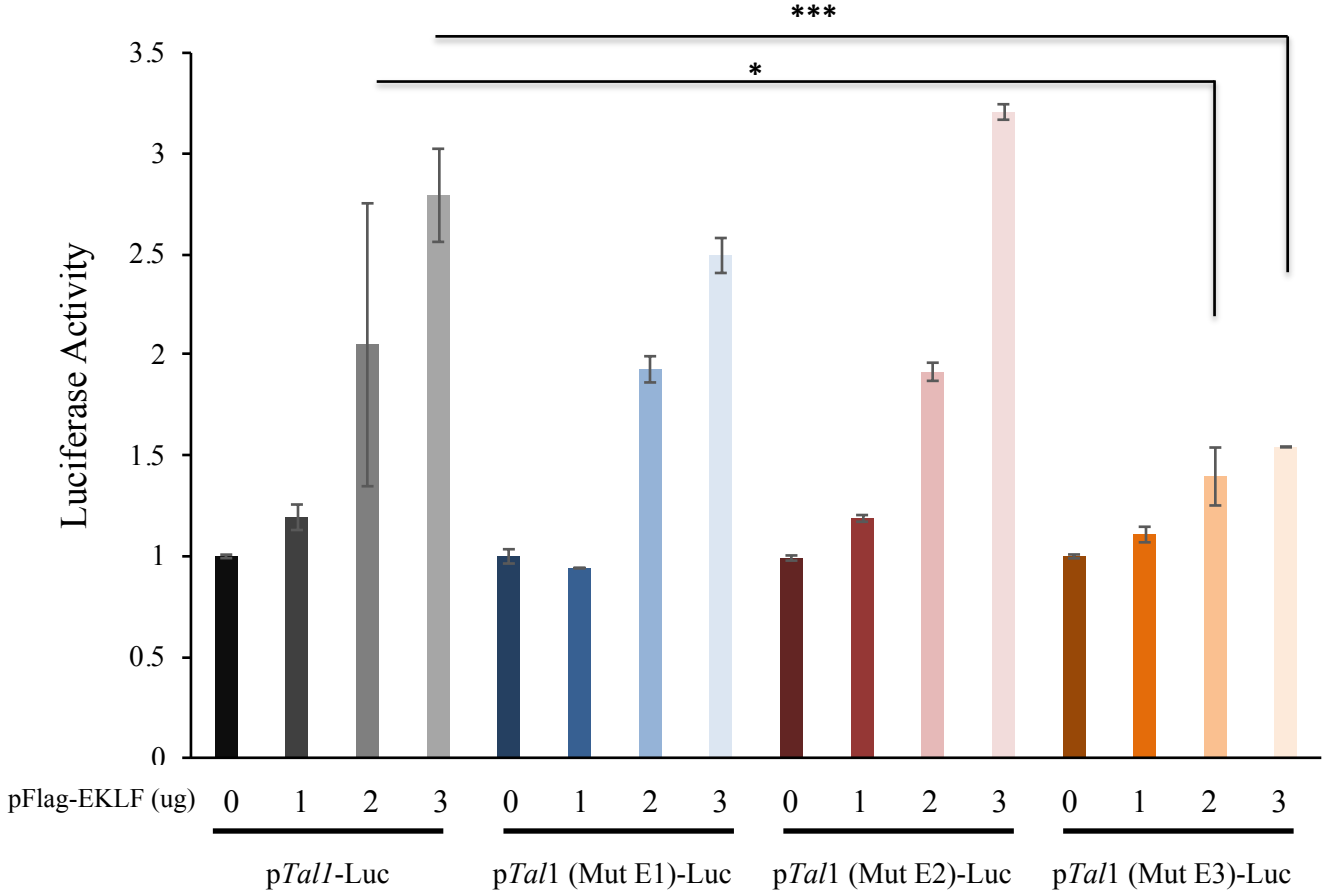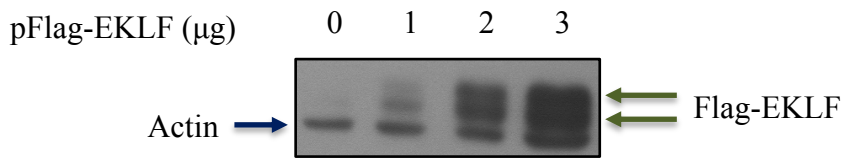

Source: https://biorxiv.org/content/10.1101/2021.04.08.439008v1.full.pdf
